# Supplementary material for: Protocol for the mixed methods, Managing young people (aged 16–25) with Attention deficit hyperactivity disorder in Primary care (MAP) study: mapping current practice and co-producing guidance to improve healthcare in an underserved population
Source: PubMed Central journal article supplement — BMJ Open. 2023 Jul 10;13(7):e068184. doi: 10.1136/bmjopen-2022-068184 (PMC10335488; doi:10.1136/bmjopen-2022-068184), 2023-07-10
Supplement: bmjopen-2022-068184.draft_revisions.pdf [file bmjopen-2022-068184.draft_revisions.pdf]

# BMJ Open

BMJ Open is committed to open peer review. As part of this commitment we make the peer review history of every article we publish publicly available.

When an article is published we post the peer reviewers' comments and the authors' responses online. We also post the versions of the paper that were used during peer review. These are the versions that the peer review comments apply to.

The versions of the paper that follow are the versions that were submitted during the peer review process. They are not the versions of record or the final published versions. They should not be cited or distributed as the published version of this manuscript.

BMJ Open is an open access journal and the full, final, typeset and author-corrected version of record of the manuscript is available on our site with no access controls, subscription charges or pay-per-view fees (<http://bmjopen.bmj.com>).

If you have any questions on BMJ Open's open peer review process please email [info.bmjopen@bmj.com](mailto:info.bmjopen@bmj.com)

# BMJ Open

## Managing young people with Attention deficit hyperactivity disorder in Primary care (MAP), mapping current practice and co-producing guidance to improve healthcare in an underserved population: protocol for a mixed-methods study

|                               |                                                                                                                                                                                                                                                                                                                                                                           |
|-------------------------------|---------------------------------------------------------------------------------------------------------------------------------------------------------------------------------------------------------------------------------------------------------------------------------------------------------------------------------------------------------------------------|
| Journal:                      | <i>BMJ Open</i>                                                                                                                                                                                                                                                                                                                                                           |
| Manuscript ID                 | bmjopen-2022-068184                                                                                                                                                                                                                                                                                                                                                       |
| Article Type:                 | Protocol                                                                                                                                                                                                                                                                                                                                                                  |
| Date Submitted by the Author: | 16-Sep-2022                                                                                                                                                                                                                                                                                                                                                               |
| Complete List of Authors:     | Price, Anna; University of Exeter Medical School<br>Smith, Jane; University of Exeter Medical School<br>Mughal, Faraz; Keele University School of Medicine; NIHR Greater Manchester Patient Safety Translational Research Centre, Keele University<br>Salimi, Anita; University of Exeter Medical School<br>Newlove-Delgado, Tamsin ; University of Exeter Medical School |
| Keywords:                     | PRIMARY CARE, Organisation of health services < HEALTH SERVICES ADMINISTRATION & MANAGEMENT, MENTAL HEALTH, Child & adolescent psychiatry < PSYCHIATRY, QUALITATIVE RESEARCH                                                                                                                                                                                              |
|                               |                                                                                                                                                                                                                                                                                                                                                                           |

SCHOLARONE™  
Manuscripts

1  
2  
3  
4  
5  
6 **TITLE:** Managing young people with Attention deficit hyperactivity disorder in Primary care (MAP),  
7 mapping current practice and co-producing guidance to improve healthcare in an underserved  
8 population: protocol for a mixed-methods study  
9

10  
11 **SHORT STUDY TITLE:** Managing young people with ADHD in primary care (MAP) study  
12  
13

14  
15 **Authors**

16 Anna Price<sup>1</sup>, Jane R. Smith<sup>1</sup>, Faraz Mughal<sup>2,3</sup>, Anita Salimi<sup>1</sup>, Tamsin Newlove-Delgado<sup>1</sup>

17  
18 <sup>1</sup>*University of Exeter Medical School, Exeter, EX1 2LU, UK.*

19  
20 <sup>2</sup>*School of Medicine, Keele University, Keele, ST5 5BG*

21  
22 <sup>3</sup>*NIHR Greater Manchester Patient Safety Translational Research Centre, Keele University, Keele*  
23  
24

25 **Corresponding author:**

26 Dr Anna Price,

27 School for Primary Care Research,

28 University of Exeter Medical School,

29 South Cloisters

30 St Luke's Campus,

31 Exeter,

32 EX1 2LU,

33 Email: [a.price@exeter.ac.uk](mailto:a.price@exeter.ac.uk)

34  
35  
36  
37  
38  
39  
40  
41  
42  
43  
44  
45  
46  
47  
48  
49  
50  
51  
52  
53  
54  
55  
56  
57  
58  
59  
60  
01392 726026

56  
57  
58  
59  
60 **Key words:** Attention Deficit Hyperactivity Disorder (ADHD), Primary Care, Mixed-methods, Co-production.

**Protocol Version:** 1 Date: 18/05/2022

**Word count:** 3861 (not including title page, abstract, references, figures, tables, or acknowledgments)

## ABSTRACT

**Introduction:** Attention deficit hyperactivity disorder (ADHD) is the most common neurodevelopmental disorder in children and adolescents, with an average worldwide prevalence of 5%. Up to 40% of young people continue to experience symptoms into adulthood. Young people with ADHD experience poorer outcomes than their peers across multiple domains, with treatment shown to reduce these risks. Primary care practitioners play an important role in healthcare provision for this group in the UK. However, many feel unsure about how best to provide support, reporting prescribing concerns and need for more evidence-based guidance. A lack of national data on primary care provision hinders efforts to improve access to care and optimise outcomes. This mixed-methods study aims to enhance the evidence-base to improve primary care services for young people aged 16-25 years with ADHD.

**Methods and analysis:** There are three interlinked work packages: (1) A mapping study including a survey of stakeholders (healthcare professionals, people with ADHD, and commissioners) will map ADHD prescribing practice, shared-care arrangements, available support, and practitioner roles by geographic locations across England for the different respondent groups. (2) A qualitative study involving semi-structured interviews with stakeholders (10-15 healthcare professionals and 10-15 people with ADHD) will explore experiences of 'what works' and 'what is needed' in terms of service provision and synthesise findings. (3) Workshops will integrate findings from (1) and (2) and work with stakeholders to use this evidence to co-develop key messages and guidance to improve care.

**Ethics and dissemination:** The protocol has been approved by Yorkshire and the Humber – Bradford Leeds Research Ethics Committee. Recruitment commenced in September 2022. Findings will be disseminated via research articles in peer-reviewed journals, conference presentations, public involvement events, patient groups, and media releases. A summary of study findings will be shared with participants at the end of the study.

**Registration:** ClinicalTrials.gov: trial number NCT05518435.

### Strengths and limitations of this study

- A national study, incorporating data from a broad range of stakeholders, including healthcare professionals, people with lived experience of ADHD (e.g., young people with ADHD and their supporters) and commissioners
- Addresses the evidence gap on current primary care provision for young people with ADHD in England, including identifying geographic variations in care, and understanding what works, and what is needed
- Comprehensive patient and public involvement, with study design inspired by patients who said that referrals, prescribing, and other support from primary care staff (such as GPs) are key to young people managing living with ADHD
- Co-production of guidance for primary care providers, informed by healthcare professionals and people with lived experience of ADHD
- A limitation is the use of convenience (non-probabilistic) sampling methods for surveying some stakeholder groups, meaning it will not be possible to say how well responses represent the target population

## INTRODUCTION

### Background

ADHD is the most common neurodevelopmental disorder in children and adolescents, with an average worldwide prevalence of 5%,<sup>[1]</sup>. Up to 40% of young people with ADHD will continue to experience symptoms into adulthood,<sup>[2]</sup>, which can affect physical and mental health, further education, work, relationships, involvement with criminal justice, and mortality, with ensuing economic impacts on the individual and society,<sup>[1, 3]</sup>. A recent UK surveillance study estimated that the annual number of people aged 17–19 years with an ongoing need for ADHD medication lies between 270 and 599 per 100,000, with an even higher number requiring non-pharmacological support for their ADHD,<sup>[4]</sup>. Higher ADHD prevalence is associated with financial difficulties and economic disadvantage, resulting in higher service needs in some areas,<sup>[5]</sup>. The social and financial challenges of Covid-19 are likely to have intensified support needs, while also introducing new barriers to accessing health services. Treatment has been shown to reduce the risk of experiencing poorer outcomes in young people with ADHD,<sup>[1, 3]</sup>. Withdrawal of treatment in young people can have particularly profound effects, as this is a vulnerable life stage, when multiple simultaneous transitions are occurring,<sup>[6]</sup>.

### ADHD service provision

For young people with ADHD who require ongoing support into adulthood, UK National Institute for Health and Care Excellence (NICE) guidance recommends a smooth transition into adult services, with the prescribing and monitoring of ADHD medication carried out under shared care protocol arrangements between primary and secondary care services,<sup>[7]</sup>. However, the Children and Adolescents with ADHD in Transition between Children's and Adult Services (CATCh-uS) study estimated that less than a quarter of young people who needed ADHD medication made the transition to adult mental health services,<sup>[4]</sup>. This is likely to be due to a combination of factors, including the availability and accessibility of adult ADHD services, which vary widely, and a lack of information on, and preparation for, transition,<sup>[4, 8-12]</sup>. Even where medication is continued, management of ADHD may be sub-optimal without access to specialist assessment of ADHD, advice on titration, or non-pharmacological support,<sup>[13]</sup>.

The variation in services and support for young people (aged 16-25 years) with ADHD creates inequities in access and increases pressure on primary care,<sup>[8-10]</sup>. As a result, general practitioners (GPs) may end up providing care for young people with ADHD 'by default' due to long waiting times, a lack of adult services, or because a person does not meet service eligibility criteria,<sup>[10-12]</sup>; with some GPs reporting concerns about safety, risk and responsibility and workload,<sup>[10]</sup>. Variations in prescribing protocols and classification of ADHD drugs in local formularies,<sup>[10]</sup> means some young people may also have difficulties registering with a GP willing to prescribe. Young people with ADHD have expressed a lack of confidence in primary care to help them manage their condition, and report frustration with the information provided by GPs and the support available,<sup>[11, 12, 14, 15]</sup>.

### Primary care

Debates over how to tackle a 'failure of healthcare' for ADHD, especially at transition, often include an expanded role for primary care through recently established primary care networks (PCNs) of GP practices,<sup>[6, 16]</sup>. NICE recommend further studies about the role of primary care in supporting young people discharged from children's services,<sup>[17]</sup>. Challenges around shared care and guidance

1  
2  
3  
4  
5  
6 implementation have been recognised by working groups established by the UK Adult ADHD Network  
7 (UKAAN), and NHS England,[6]. There is currently no overview or map of the different models of care  
8 and roles that exist in primary care to support people with ADHD, though our own and others'  
9 qualitative research has highlighted variations in prescribing practice and shared care models,[16].  
10 NHS England's mandate to strengthen primary care and reduce inequalities, needs to be met through  
11 consulting with patients and the public, and using the patient pathway approach,[18]. However, the  
12 current lack of national level data mapping pathways in primary care for young people with ADHD, is  
13 hindering efforts to optimise outcomes for this underserved group.  
14  
15

## 16 **Co-production**

17  
18 Co-production which can be defined as ways of working that involve people using health services,  
19 carers, practitioners, and the wider community, is increasingly seen as critical for research aiming to  
20 strengthen health and care systems,[19, 20]. This rapidly evolving methodology within health and  
21 social care research, which is advocated and supported by the National Institute for Health and Care  
22 Research (NIHR),[19], is characterised by key principles of:  
23

- 24 • the sharing of power (so that research is jointly owned by those involved),
- 25 • including all perspectives and skills (so that all those who can contribute are included), and
- 26 • respecting and valuing the knowledge of all those working together (with equal importance).  
27  
28

29  
30 The Five Year Forward View for Mental Health,[21] called for development of evidence-based  
31 approaches to co-production in commissioning. The NHS Long Term Plan,[22] also emphasises the  
32 importance of working collaboratively to find solutions to address unmet health and social care  
33 needs. Therefore, research aiming to provide evidence to tackle identified 'failures' in NHS healthcare  
34 provision for young people with ADHD needs to involve stakeholders who can contribute varied  
35 knowledge and experience throughout the research process.  
36

## 37 **RATIONALE**

38  
39 This research has been developed in response to identified gaps in the literature and existing services  
40 (as outlined above), and priorities highlighted by people with ADHD. The research team includes  
41 young people with ADHD whose input will help ensure the research is sensitive and relevant, an  
42 academic GP to ensure identified solutions are deliverable within primary care settings. Also, our  
43 research advisory groups (RAGs), made up of healthcare practitioners and young people with ADHD  
44 and their supporters.  
45

46  
47 Under the NHS Long Term plan,[22] and NHS Mental Health Implementation plan,[23] the recent  
48 formation of PCNs in combination with the establishment of NHS integrated care systems (ICSs)  
49 (partnerships of organisations that come together to plan and deliver joined up health and care  
50 services), represents an opportunity to establish new and effective working practices to enable  
51 consistent and accessible healthcare for all young people with ADHD. The NHS Community Mental  
52 Health Framework,[24] also sets out a vision for how community services should modernise to offer  
53 joined-up-care for those with mental health needs, within ICSs. The evidence base outlined above,  
54 and current guidelines,[7] highlight the key role primary care services have to play in the provision of  
55 healthcare for young people with ADHD. Not only are primary care practitioners, such as GPs, often  
56 the gatekeepers through the referral system to secondary care services, such as adult mental health  
57 and specialist ADHD services, but NICE guidelines recommend that they also provide healthcare  
58 support such as routine monitoring, and prescribing of medication under shared care agreements  
59 with secondary care services,[7].  
60

1  
2  
3  
4  
5  
6 Furthermore, primary care services have an increasing role to play in terms of providing mental health  
7 and wellbeing support to young people with ADHD, with additional roles such as mental health  
8 workers and social prescribing link workers funded through PCNs,[25]. However, the challenges for  
9 primary care in delivering co-ordinated and accessible healthcare for young people with ADHD, need  
10 to be better understood.  
11

12 Currently, little is known about whether or how services are provided for young people with ADHD in  
13 primary care in England, or about areas of good practice, and optimal models and pathways for  
14 improving access to healthcare for this underserved group. While the NHS Long Term Plan,[22] aims  
15 to dissolve the historic divide between primary and secondary/specialist care, delivering healthcare  
16 across systems remains challenging. For example, existing evidence indicates that GPs can feel  
17 unsupported and uncertain about providing medication under shared care agreements,[10, 26].  
18

19 In line with current need, the aim of this research is therefore to map current services and provide an  
20 evidence-base to inform co-produced guidance to improve primary care for young people aged 16-25  
21 years with ADHD. The objectives are to:  
22  
23

- 24 1. Develop a national map and overview of current primary care pathways and prescribing  
25 practice in the management of young people with ADHD
- 26 2. Explore:
  - 27 ○ Primary care providers and related organisations' needs for prescribing support in their  
28 roles managing care for young people with ADHD
  - 29 ○ The expectations and needs of young people regarding ADHD support, information,  
30 and management in primary care
- 31 3. Co-produce evidence informed guidance to better co-ordinate primary care and improve  
32 accessibility for young people with ADHD, based on discussions around integrated findings  
33 from objectives 1 and 2  
34  
35  
36  
37  
38

## 39 **METHODS AND ANALYSIS**

### 40 **Overview**

41  
42 This mixed-methods study consists of three work packages to address the three objectives outlined  
43 above: a national survey, qualitative interviews, and integration of findings to support co-production  
44 of guidance. Participants in each will include people aged 16 or over with lived experience of ADHD  
45 (and their supporters), health professionals with a focus on primary care (such as GPs, nurses, mental  
46 health practitioners, and clinical pharmacists), and primary care commissioners/providers. Sampling,  
47 recruitment strategies, and eligibility criteria, vary slightly between work packages. For details of  
48 eligibility criteria by work package (WP), see figure 1.  
49  
50  
51

52  
53 >>Insert figure 1 here<<  
54  
55

56 The research will be guided and informed throughout by six-monthly meetings with two research  
57 advisory groups (RAGs) made up of a diverse mix of primary healthcare practitioners, and young  
58 people with ADHD and their parents/carers. These will be a practice and policy research advisory  
59 group (P-RAG), and a young person and parent/carer research advisory group (Y-RAG).  
60



1  
2  
3  
4  
5  
6 Named research partners will support delivery of the research, including advising on delivery of the  
7 research and dissemination of results. These include the ADHD Foundation, the UK Adult ADHD  
8 Network (UKAAN), NIHR Clinical Research Network South West Peninsula, and Devon Partnership NHS  
9 Trust (DPT).

## 10 11 **Work package one (WP1) Survey**

### 12 13 Design

14 A mapping study will involve a national online survey of primary care provision for young people and  
15 adults with ADHD in England. Informants will be sampled from three key stakeholder groups - service  
16 users, healthcare professionals, and commissioners/providers - via a mixture of convenience and  
17 purposive techniques. The target sample size will be a minimum of 252 participants in total (providing  
18 a minimum of six responses for each ICS in England). The survey will be open for up to 16 weeks.  
19 Responses will be reviewed part-way through this period, with subsequent survey promotion and  
20 reminders targeted to achieve a balanced mix of responses by geographic location and stakeholder  
21 group. The survey will use the seven-step pragmatic health service mapping method, developed  
22 through extensive patient and public involvement,[27], and previously used to map adult mental  
23 health service availability for adults with ADHD in England in 2018,[9].

### 24 25 26 27 Participants

28 Participants located across England will be invited to participate via direct email, social media, partner  
29 organisation mailing lists, and organisation newsletters and websites. For eligibility criteria, see figure  
30 1.  
31

### 32 33 Data collection

34 Data will be collected online via a certified GDPR compliant online survey tool; Qualtrics® (Provo, UT,  
35 USA. <https://www.qualtrics.com>). The survey will include demographic questions about the  
36 respondent's role, location, and any practice/organisation they are linked to, and core research  
37 questions (see figure 2) exploring current primary care practice in relation to the NICE [7] guidelines  
38 for diagnosis and management of ADHD. The survey will be designed (and programmed) so that  
39 respondents will be taken to different questions, depending on the stakeholder group that they  
40 primarily identify with. Final survey wording will be piloted and agreed in consultation with study  
41 RAGs.  
42  
43  
44

45  
46 >>Insert figure 2 here<<  
47  
48

### 49 50 Analysis

51 Data will be analysed using Stata® SE15 (StataCorp LP, College Station, TX, USA). Descriptive statistics  
52 will be used to summarise respondent characteristics by geographic location and stakeholder group. A  
53 full data analysis and presentation plan will be developed and informed by discussions with study  
54 RAGs. Variation by stakeholder group and local area characteristics (e.g., rural/urban, ethnic mix,  
55 socio-economic status) will be summarised and tabulated by geographic unit. The unit size (e.g., PCN,  
56 ICS, NHS Region) used in each analysis will be dependent on the volume of available data, and  
57 whether an analysis at the stated level will provide meaningful information, following consultation  
58 with stakeholder groups. Where appropriate, data will be presented on a map of England using a  
59  
60

1  
2  
3  
4  
5 geographic information system (QGIS 3.24), illustrating variation by region or other geographic unit  
6 on prescribing practice, shared care, specialist support etc. Accessible visual tools, such as Google®  
7 My Map, will be used to communicate findings with stakeholders.  
8  
9

## 10 **Work package two (WP2) Qualitative**

### 11 Design

12  
13 A qualitative study consisting of semi-structured interviews (or focus-groups) with a sample of 10-15  
14 young people with ADHD and their supporters, and 10-15 primary care professionals/commissioners  
15 from a range of geographic locations in England. The number of locations (between three and six) and  
16 boundaries (e.g., GP surgery, PCN, or ICS) will be decided based on findings from WP1. Locations will  
17 be purposively chosen (informed by findings from WP1) to reflect a variety of local approaches to  
18 primary care practice for treatment and support of ADHD. These might for example include a GP  
19 surgery serving university students, or an urban surgery with a GP who has a special interest in mental  
20 health.  
21  
22

### 23 Participants

24  
25 Participants will be purposely sampled to include of a diverse mix of young people with ADHD and  
26 their parent/carers, health professionals, and commissioners/providers of NHS services for ADHD. For  
27 eligibility criteria, see figure 1.  
28  
29

### 30 Data collection

31  
32 Data will be collected using semi-structured interviews/focus-groups that follow topic guides  
33 developed and refined in consultation with the RAGs. Topic guides will be iteratively adjusted and will  
34 contain similar prompts for interviews and focus groups. For health professionals, these will cover  
35 perspectives on their role in managing young people with ADHD, needs for support with prescribing  
36 and other aspects of management, the information they need in terms of format, content and timing,  
37 their awareness of existing information resources and their preferences regarding access to and use  
38 of information in their role. For young people, these will cover perspectives on their experiences of  
39 support from primary care, their expectations from primary care consultations and the information  
40 and signposting needed to access care. Topic guides will also cover the following content:  
41  
42

- 43 • Background on participant's current ADHD/healthcare context
- 44 • Experiences of
  - 45 ○ Care and support for ADHD through primary care
  - 46 ○ Support for wider mental and physical health need of people with ADHD through
  - 47 primary care
  - 48
- 49 • Adjustments to help people with ADHD access primary care
- 50 • Experiences of primary care consultations
- 51 • Information and resources that might improve provision and accessibility of healthcare for
- 52 young people with ADHD through primary care
- 53
- 54
- 55

56  
57 Interviews/focus-groups will be conducted using a variety of mediums (e.g., online meetings, by  
58 telephone, or face-to-face), depending on the needs and preferences of participants. This flexible  
59 approach draws on evidence that respondents' experience of control and choice affects study take up  
60 [28]. It is also designed to accommodate the communication preferences and needs of young people

1  
2  
3  
4  
5 with ADHD and their supporters and takes account of the limited availability of healthcare  
6 professionals, thus maximising the inclusivity of the research. Where individual interviews are not  
7 feasible due to resource or time constraints (for example from a busy primary care team), focus-  
8 groups will be conducted to collect data. Focus groups may also generate richer data in some  
9 circumstances, for example when discussing care pathways potentially involving multiple roles.  
10  
11

## 12 Analysis

13  
14 Data from WP2 will be managed in NVivo (QSR International, Warrington, UK), and analysed using  
15 reflexive thematic analysis (RTA),[29, 30]. A codebook approach will be used to structure findings and  
16 provide insights suitable for applied policy research,[29, 31, 32]. The research process will be  
17 informed by an acknowledgement of the researcher's active role in knowledge production, and a  
18 recognition of the interpretive nature of data coding,[29]. The framework method,[32-34], will be  
19 used to generate themes reflexively through a process of inductive and deductive analyses, and a  
20 combination of semantic and latent coding,[35]. The analysis will be underpinned by a critical realist  
21 perspective. This reflexive theoretical stance will highlight the context of the data, and the influence  
22 of researcher and stakeholder perspectives, providing a nuanced interpretation of meaning suitable  
23 to inform the co-production of guidance (in WP3).  
24  
25

26 An understanding of the need for information resources and prescribing and healthcare support will  
27 be developed within a range of different geographical and socio-economic contexts, and different  
28 models of care.  
29

## 30 **Work package three (WP3) Co-production**

### 31 Design

32  
33 Co-production methods consisting of a series of consultations, will be conducted in line with national  
34 standards for public involvement,[36] and following national guidance on co-producing a research  
35 project,[19]. The outline design for WP3 will be refined through consultation with the RAGs, research  
36 partners, and shaped following integration of findings from WP1 and WP2 into emerging themes and  
37 priority areas. A flexible research design, informed by previously documented co-production  
38 methods,[37] will enable participants to co-produce guidance using available evidence, to improve  
39 primary care for young people with ADHD.  
40  
41  
42

### 43 Participants

44  
45 There will be between six and 16 participants, reflecting a diversity of roles and experience including  
46 young people with ADHD (and their parents/carers), health professionals, and members of the  
47 research team. The number of participants will be kept small to enable flexible and interactive debate  
48 between participants. For eligibility criteria, see figure 1.  
49

### 50 Data collection

51  
52 Data will be collected by means of between two and four workshops that build iteratively on each  
53 other; with additional discussion facilitated through meetings and emails. Workshops and meetings  
54 will be conducted using variety of mediums (e.g., online meetings, or face-to-face), depending on the  
55 needs and preferences of participants. WP3 will bring stakeholders together, providing space and  
56 time to consider and integrate evidence from WP1 and WP2, and to engage in discussions, refinement  
57 of ideas, and prioritisation setting exercises. The aim will be to produce accessible outputs designed  
58 for communication with a variety of audiences (e.g., health professionals, service users and service  
59 commissioners/providers). Possible outputs include:  
60

- A map of patient pathways for young people accessing ADHD treatment and support through primary care,
- A geographic overview of primary care provision, including areas of good practice and gaps in accessible care
- Templates for information resources for primary care practitioners and young people, including a plan for further implementation
- Key messages for primary care practitioners and young people (e.g., what information do practitioners need to prescribe and titrate, what questions do young people want answers to?)
- Suggestions for innovative technology-supported solutions to assist healthcare providers and young people with addressing the challenges encountered when care spans primary and secondary care systems

Throughout WP3, the research team will maintain written records that chronicle and record information about the research process. Researchers will keep reflective diaries, recording tensions, sticking points and what is working well.

#### Analysis

WP3 will involve design followed by trialling and iterative refinement of integrated findings and co-produced outputs. A record will be kept of participant feedback on outputs. Co-produced guidance will be checked by research team members who have not been directly involved in the analysis, and with members of the RAGs, who will be asked to provide feedback on the output to verify its validity and consult on suitable methods of dissemination. Participant approved final versions of guidance and information will be disseminated as part of MAP study findings, using a variety of formats.

#### Outcomes

The outcomes of this research will be shaped by close work with professionals and members of the community to ensure their relevance and utility. Anticipated outcomes include:

- National overview of primary care provision for young people with ADHD across England, including:
  - Geographic map, showing variation in provision by NHS region or appropriate organisational boundaries
- Qualitative findings reflecting the perspectives of people involved in providing and in need of care, on the management of ADHD in primary care including:
  - Health professionals' needs for prescribing support
  - Young people with ADHD and their parent/carers' needs for healthcare and support with self-management
- Co-produced guidance on how to better design and co-ordinate primary care for young people aged 16-25 years with ADHD

1  
2  
3  
4  
5  
6  
7  
8  
9  
10  
11  
12  
13  
14  
15  
16  
17  
18  
19  
20  
21  
22  
23  
24  
25  
26  
27  
28  
29  
30  
31  
32  
33  
34  
35  
36  
37  
38  
39  
40  
41  
42  
43  
44  
45  
46  
47  
48  
49  
50  
51  
52  
53  
54  
55  
56  
57  
58  
59  
60

Research outcomes will be communicated to a range of academic, clinical, and lay audiences via a range of mediums including peer reviewed academic publications, lay summaries, presentations at academic and organisational conferences, and via the study website.

### **Patient and Public Involvement**

This proposal stemmed from requests made by participants in previous research [38] for information about GPs who prescribe for ADHD. Meetings between members of the research team and young people with ADHD, including AS who is an expert by experience and part of the research team, helped shaped the study design.

Patient and public involvement in this research will be conducted in accordance with the NIHR National Standards for Public Involvement,[20]. It will follow a framework for involvement to include respect, support, transparency, responsiveness, fairness of opportunity, and accountability. People and the community will be involved in all stages of this research.

Involvement and engagement of all stakeholders will be built into the culture of this research study and embedded in research processes through the following study structures:

- Core research group: inclusion of a young person with ADHD and an academic GP
- Research advisory groups (RAGs) meeting regularly to shape research progress:
  - Y-RAG, made up of young people with ADHD and their parent/carers
  - P-RAG made up of practitioners and service commissioners/providers
- Research partnerships: with service user and practitioners' organisations such the UK ADHD Foundation and Devon Partnership Trust (DPT)
- Research design: use of co-production methodology in WP3 to jointly generate guidance and outputs

### **Data statement**

A technical appendix and dataset will be available from the lead author on request. Data will be stored in accordance with Exeter University's data storage policies. If agreed with the research team, qualitative data (from WP2 and WP3) will be deposited with the UK Data Service, for long-term preservation.

### **ETHICS AND DISSEMINATION**

The protocol has been approved by the Yorkshire and the Humber – Bradford Leeds Research Ethics Committee (REC Reference: IRAS 313424). The study will be carried out in accordance with the Declaration of Helsinki (Fortaleza, Brazil, October 2013), the UK Policy Framework for Health and Social Care Research (2020) and the general principles of Good Clinical Practice E6 (R2). The study has been adopted by the National Institute for Health Research (NIHR) Clinical Research Network and has relevant local NHS research approvals. The trial is sponsored by the University of Exeter.

This research aims to answer a research question that is relevant and of importance to young people with ADHD, a currently underserved population in the UK. It is supported and informed by research advisors and partner organisations who represent the views and experiences of people with lived experience of ADHD, health professionals, and commissioners/providers. The collaborative research design will help to ensure that the research is conducted in a sensitive manner and will result in outputs that are appropriately communicated and useful.

## Amendments

Sponsor SOPs are being followed for amendments. Please note, it is anticipated that versions of study documents (e.g., Consent forms) may be updated following planned stakeholder engagement activities. Where documents are amended, HRA guidance on amending an approval will be followed, and advice and approval of the study Sponsor will be sought on whether changes qualify as non-substantial or substantial amendments. In all cases, HRA processes will be followed, with documents updated in IRAS (using version control) and communicated to the REC (as appropriate).

For peer review only



## FUNDING

This project is funded by an NIHR Three School's Mental Health Research Fellowship (MHF008) and . AP and research project activities are funded by this fellowship. The grant is administered by the NIHR School for Primary Care Research. The study Sponsor has seen, approved, and signed off the Protocol. This project is supported by the NIHR Clinical Research Network South West Peninsula.

FM is funded by a NIHR Doctoral Fellowship (NIHR300957) and is an affiliate of the NIHR Greater Manchester Patient Safety Translational Research Centre. This work was supported by the NIHR Greater Manchester Patient Safety Translational Research Centre (award number: PSTRC-2016-003). TND is funded by an NIHR Advanced Fellowship (NIHR300056). The views expressed are those of the author(s) and not necessarily those of the NIHR or the Department of Health and Social Care.

## Author declarations of competing interests

Dr Price, Dr Smith, Dr Mughal, Dr Salimi<sup>1</sup>, Dr Tamsin Newlove-Delgado have nothing to disclose.

## Contributor-ship statement

The research idea was inspired by and developed with people with ADHD and their supporters. The original research design stemmed from development work conducted by AP and TND. All authors actively contributed to the research design. AP, TND, and JS developed the protocol. AP leads the study, drafted the protocol ready for publication, and wrote the ethics submission. TND and JS provide research oversight and academic mentorship. FM is an academic GP and leads on healthcare professional representation and provides primary care expertise. AS leads on patient and public involvement (PPI) representation. All authors commented on the protocol and the manuscript, provided final approval for publication, and agree to be accountable for all aspects of the work in ensuring that questions related to the accuracy or integrity of any part of the work are appropriately investigated and resolved.

## Acknowledgements

We would like to thank all those who have contributed to this study, including the healthcare professionals, and people with ADHD and their supporters who have been involved in the conception and planning of this research. Also, the colleagues, collaborators, and research partners that have supported every aspect of this study.

## Exclusive Licence

I, the Submitting Author has the right to grant and does grant on behalf of all authors of the Work (as defined in the below author licence), an exclusive licence and/or a non-exclusive licence for contributions from authors who are: i) UK Crown employees; ii) where BMJ has agreed a CC-BY licence shall apply, and/or iii) in accordance with the terms applicable for US Federal Government officers or employees acting as part of their official duties; on a worldwide, perpetual, irrevocable, royalty-free basis to BMJ Publishing Group Ltd ("BMJ") its licensees and where the relevant Journal is co-owned by BMJ to the co-owners of the Journal, to publish the Work in BMJ Open and any other BMJ products and to exploit all rights, as set out in our licence.

The Submitting Author accepts and understands that any supply made under these terms is made by BMJ to the Submitting Author unless you are acting as an employee on behalf of your employer or a postgraduate student of an affiliated institution which is paying any applicable article publishing

1  
2  
3  
4  
5 charge (“APC”) for Open Access articles. Where the Submitting Author wishes to make the Work  
6 available on an Open Access basis (and intends to pay the relevant APC), the terms of reuse of such  
7 Open Access shall be governed by a Creative Commons licence – details of these licences and  
8 which Creative Commons licence will apply to this Work are set out in our licence referred to above.  
9  
10

### 11 **Figure legends**

12  
13  
14 Figure 1. Participant eligibility criteria, by work package.

15  
16 Figure 2. Work package 1 (survey), core research questions.  
17  
18  
19  
20  
21  
22  
23  
24  
25  
26  
27  
28  
29  
30  
31  
32  
33  
34  
35  
36  
37  
38  
39  
40  
41  
42  
43  
44  
45  
46  
47  
48  
49  
50  
51  
52  
53  
54  
55  
56  
57  
58  
59  
60



## REFERENCES

1. Sayal, K., et al., *Pathways to care in children at risk of attention-deficit hyperactivity disorder*. Br J Psychiatry, 2002. **181**(01): p. 43-8.
2. Faraone, S.V., J. Biederman, and E. Mick, *The age-dependent decline of attention deficit hyperactivity disorder: a meta-analysis of follow-up studies*. Psychol Med, 2006. **36**(2): p. 159-65.
3. Shaw, M., et al., *A systematic review and analysis of long-term outcomes in attention deficit hyperactivity disorder: effects of treatment and non-treatment*. BMC Med, 2012. **10**(1): p. 99.
4. Eke, H., et al., *Transition between child and adult services for young people with attention-deficit hyperactivity disorder (ADHD): findings from a British national surveillance study*. Br J Psychiatry, 2020. **217**(5): p. 616-622.
5. Prasad, V., et al., *Attention-deficit/hyperactivity disorder: variation by socioeconomic deprivation*. Arch Dis Child, 2019. **104**(8): p. 802-805.
6. Young, S., et al., *Recommendations for the transition of patients with ADHD from child to adult healthcare services: a consensus statement from the UK adult ADHD network*. BMC Psychiatry, 2016. **16**: p. 301.
7. NICE. *Attention deficit hyperactivity disorder: diagnosis and management (NG87)*. 2018 [cited 2019 29th March]; Available from: <https://www.nice.org.uk/guidance/ng87/chapter/Recommendations>.
8. Hall, C.L., et al., *Services for young people with attention deficit/hyperactivity disorder transitioning from child to adult mental health services: a national survey of mental health trusts in England*. J Psychopharmacol, 2015. **29**(1): p. 39-42.
9. Price, A., et al., *Mapping UK mental health services for adults with attention-deficit/hyperactivity disorder: national survey with comparison of reporting between three stakeholder groups*. BJPsych Open, 2020. **6**(4): p. e76.
10. Newlove-Delgado, T., et al., *Young people with attention deficit hyperactivity disorder in transition from child to adult services: a qualitative study of the experiences of general practitioners in the UK*. BMC Fam Pract, 2019. **20**(1): p. 159.
11. Matheson, L., et al., *Adult ADHD patient experiences of impairment, service provision and clinical management in England: a qualitative study*. BMC Health Serv Res, 2013. **13**: p. 184.
12. Newlove-Delgado, T., et al., *'You're 18 now, goodbye': the experiences of young people with attention deficit hyperactivity disorder of the transition from child to adult services*. Emotional and Behavioural Difficulties, 2018. **23**(3): p. 296-309.
13. Coghill, D.R., *Organisation of services for managing ADHD*. Epidemiol Psychiatr Sci, 2017. **26**(5): p. 453-458.
14. French, B., K. Sayal, and D. Daley, *Barriers and facilitators to understanding of ADHD in primary care: a mixed-method systematic review*. Eur Child Adolesc Psychiatry, 2019. **28**(8): p. 1037-1064.
15. Price, A., et al., *In transition with ADHD: the role of information, in facilitating or impeding young people's transition into adult services*. BMC psychiatry, 2019. **19**(1): p. 404.
16. Young, S., et al., *Failure of Healthcare Provision for Attention-Deficit/Hyperactivity Disorder in the United Kingdom: A Consensus Statement*. Front Psychiatry, 2021. **12**: p. 649399.
17. NICE. *Transition from children's to adults' services for young people using health or social care services (NG43)*. 2016 [cited 2019 3rd April]; Available from: <https://www.nice.org.uk/guidance/ng43>.
18. NHS England. *General practice forward view*. 2016 [cited 2021 3rd October]; Available from: <https://www.england.nhs.uk/publication/general-practice-forward-view-gpfv/>.
19. NIHR. *Guidance on co-producing a research project*. 2021 [cited 2022 8th March]; Available from: <https://www.learningforinvolvement.org.uk/?opportunity=nihr-guidance-on-co-producing-a-research-project>.
20. NIHR. *UK Standards for Public Involvement*. 2019 [cited 2022 8th March]; Available from: <https://sites.google.com/nihr.ac.uk/pi-standards/standards>.
21. NHS England. *Five year forward view*. 2014 [cited 2019 29th March]; Available from: <https://www.england.nhs.uk/publication/nhs-five-year-forward-view/>.
22. NHS England. *The NHS long term plan*. 2019 [cited 2022 26th February]; Available from: <https://www.longtermplan.nhs.uk/publication/nhs-long-term-plan/>.

- 1
  - 2
  - 3
  - 4
  - 5
  - 6
  - 7
  - 8
  - 9
  - 10
  - 11
  - 12
  - 13
  - 14
  - 15
  - 16
  - 17
  - 18
  - 19
  - 20
  - 21
  - 22
  - 23
  - 24
  - 25
  - 26
  - 27
  - 28
  - 29
  - 30
  - 31
  - 32
  - 33
  - 34
  - 35
  - 36
  - 37
  - 38
  - 39
  - 40
  - 41
  - 42
  - 43
  - 44
  - 45
  - 46
  - 47
  - 48
  - 49
  - 50
  - 51
  - 52
  - 53
  - 54
  - 55
  - 56
  - 57
  - 58
  - 59
  - 60
23. NHS England. *NHS mental health implementation plan*. 2019 [cited 2022 26th February]; Available from: <https://www.longtermplan.nhs.uk/publication/nhs-mental-health-implementation-plan-2019-20-2023-24/>.
24. NHS England. *The Community Mental Health Framework for Adults and Older Adults*. 2019 [cited 2022 26th February]; Available from: <https://www.england.nhs.uk/mental-health/adults/cmhs/>.
25. Naylor, C., et al., *Mental health and primary care networks: understanding the opportunities*. The King's Fund, 2020.
26. Carrington, I.M. and J. McAloon, *Why shared-care arrangements for prescribing in attention deficit hyperactivity disorder may not be accepted*. *Eur J Hosp Pharm*, 2018. **25**(4): p. 222-224.
27. Price, A., et al., *Seven steps to mapping health service provision: lessons learned from mapping services for adults with Attention-Deficit/Hyperactivity Disorder (ADHD) in the UK*. *BMC Health Serv Res*, 2019. **19**(1): p. 468.
28. Catania, J.A., et al., *Effects of interviewer gender, interviewer choice, and item wording on responses to questions concerning sexual behavior*. *Public Opinion Quarterly*, 1996. **60**(3): p. 345-375.
29. Braun, V. and V. Clarke, *Reflecting on reflexive thematic analysis*. *Qual Res Sport Exerc Health*, 2019. **11**(4): p. 589-597.
30. Braun, V. and V. Clarke, *Using thematic analysis in psychology*. *Qualitative research in psychology*, 2006. **3**(2): p. 77-101.
31. Smith, J. and J. Firth, *Qualitative data analysis: the framework approach*. *Nurse researcher*, 2011. **18**(2): p. 52-62.
32. Ritchie, J., J. Lewis, and G. Elam, *Designing and selecting samples*. 2003: London: Sage.
33. Gale, N.K., et al., *Using the framework method for the analysis of qualitative data in multi-disciplinary health research*. *BMC Med Res Methodol*, 2013. **13**: p. 117.
34. Ritchie, J. and L. Spencer, *Qualitative data analysis for applied policy research*, in *Analyzing Qualitative Data*, A. Bryman and R. Burgess, Editors. 1994, Routledge: New York.
35. Byrne, D., *A worked example of Braun and Clarke's approach to reflexive thematic analysis*. *Quality & Quantity*, 2021.
36. HRA. *HRA Approval in Primary Care Settings – Principles of Study Set-Up*. 2017 [cited 2022 8th March]; Available from: <https://www.hra.nhs.uk/planning-and-improving-research/best-practice/nhs-site-set-up-in-england/>.
37. Evans, B.A., et al., *A co-produced method to involve service users in research: the SUCCESS model*. *BMC Medical Research Methodology*, 2019. **19**(1): p. 34.
38. Janssens, A., et al. *The transition from children's services to adult services for young people with attention deficit hyperactivity disorder: the CATCh-uS mixed-methods study*. 2020; Available from: <https://www.journalslibrary.nihr.ac.uk/hsdr/hsdr08420#/abstract>.

| Work package (WP)             | Inclusion criteria                                                                                                                                                                                                                                                                                                                                                                                                                                                                                                                                                                                                                                                                                              | Exclusion criteria                                                                                                                                                                                                                                                                                                                                                                                                               |
|-------------------------------|-----------------------------------------------------------------------------------------------------------------------------------------------------------------------------------------------------------------------------------------------------------------------------------------------------------------------------------------------------------------------------------------------------------------------------------------------------------------------------------------------------------------------------------------------------------------------------------------------------------------------------------------------------------------------------------------------------------------|----------------------------------------------------------------------------------------------------------------------------------------------------------------------------------------------------------------------------------------------------------------------------------------------------------------------------------------------------------------------------------------------------------------------------------|
| WP 1 (survey)                 | Identifies as one (or more) of the following: <ul style="list-style-type: none"> <li>• A person (aged 16 or over) with lived experience of ADHD, or</li> <li>• A supporter of a person with ADHD, or</li> <li>• A primary care health professional, or</li> <li>• A commissioner/provider of NHS primary care services</li> </ul> And <ul style="list-style-type: none"> <li>• Currently resident, working, or studying in England</li> </ul>                                                                                                                                                                                                                                                                   | <ul style="list-style-type: none"> <li>• Does not identify as a person aged 16 or over with ADHD, a supporter, a primary care health professional, or a commissioner/provider of NHS primary care services</li> <li>• Not currently resident, working, or studying in England</li> </ul>                                                                                                                                         |
| WP 2 (qualitative study)      | One (or more) of the following: <ul style="list-style-type: none"> <li>• A young person (aged 16-25) with ADHD, or</li> <li>• A supporter of a young person with ADHD, or</li> <li>• A primary care health professional, or</li> <li>• A commissioner/provider of NHS primary care services</li> </ul> And <ul style="list-style-type: none"> <li>• Currently resident or working in England</li> </ul> And <ul style="list-style-type: none"> <li>• Currently resident or working within the geographic locality of one of the qualitative study sites (sites to be decided based on findings from WP1)</li> </ul>                                                                                             | <ul style="list-style-type: none"> <li>• Not a young person with ADHD, a supporter, a primary care health professional, or a commissioner/provider of NHS primary care services</li> <li>• Not currently resident, working, or studying in England</li> <li>• Not currently resident, or working within the geographic locality of one of the qualitative study sites</li> </ul>                                                 |
| WP 3 (co-production research) | One (or more) of the following: <ul style="list-style-type: none"> <li>• A young person with lived experience of ADHD, or</li> <li>• A supporter of a young person with ADHD, or</li> <li>• A primary care health professional, or</li> <li>• A commissioner/provider of NHS primary care services</li> <li>• A member of the MAP study research team</li> </ul> And <ul style="list-style-type: none"> <li>• Currently resident or working in England</li> </ul> And <ul style="list-style-type: none"> <li>• Willing and able to work collaboratively and engage in consultations to co-produce evidence-based guidance for improving the co-ordination of primary care for young people with ADHD</li> </ul> | <ul style="list-style-type: none"> <li>• Not a young person with ADHD, a supporter, a primary care health professional, a commissioner/provider of NHS primary care services, or a member of the MAP study research team</li> <li>• Not currently resident, working, or studying in England</li> <li>• Not willing and able to work collaboratively and engage in consultations to co-produce evidence-based guidance</li> </ul> |

ADHD = Attention deficit hyperactivity disorder

MAP study = Managing young people with ADHD in primary care (MAP) study

Figure 1. Participant eligibility criteria, by work package.

213x279mm (72 x 72 DPI)

**Work package 1 (survey)****Core research questions:**

- Are adult ADHD medications prescribed via local primary care providers?
- Is a Shared Care Protocol in place to enable prescribing of adult ADHD medication locally through primary care?
- Is there an Adult Mental Health Service available to provide advice and support to local primary care providers in providing treatment and support for adult ADHD?
- Do local primary care providers:
  - Provide transitional support for young people with ADHD as they navigate the boundary between child and adult services?
  - Provide non-pharmacological support for young people with ADHD (such as mental health support, signposting, and provision of psychological interventions focused on ADHD)?
- What are the preferred methods for accessing information about treatment and support for young people with ADHD?
- What awareness is there of any additional or raised health risks associated with having ADHD?

Figure 2. Work package 1 (survey), core research questions.

196x138mm (72 x 72 DPI)

# BMJ Open

**Protocol for the mixed methods Managing young people with Attention deficit hyperactivity disorder in Primary care (MAP) study: mapping current practice and co-producing guidance to improve healthcare in an underserved population.**

|                                 |                                                                                                                                                                                                                                                                                                                                                                                                                          |
|---------------------------------|--------------------------------------------------------------------------------------------------------------------------------------------------------------------------------------------------------------------------------------------------------------------------------------------------------------------------------------------------------------------------------------------------------------------------|
| Journal:                        | <i>BMJ Open</i>                                                                                                                                                                                                                                                                                                                                                                                                          |
| Manuscript ID                   | bmjopen-2022-068184.R1                                                                                                                                                                                                                                                                                                                                                                                                   |
| Article Type:                   | Protocol                                                                                                                                                                                                                                                                                                                                                                                                                 |
| Date Submitted by the Author:   | 13-Mar-2023                                                                                                                                                                                                                                                                                                                                                                                                              |
| Complete List of Authors:       | Price, Anna; University of Exeter Medical School<br>Smith, Jane; University of Exeter Medical School<br>Mughal, Faraz; Keele University School of Medicine; NIHR Greater Manchester Patient Safety Translational Research Centre, Keele University<br>Salimi, Anita; University of Exeter Medical School<br>Melendez-Torres, G.J; University of Exeter,<br>Newlove-Delgado, Tamsin ; University of Exeter Medical School |
| <b>Primary Subject Heading</b>: | Health services research                                                                                                                                                                                                                                                                                                                                                                                                 |
| Secondary Subject Heading:      | General practice / Family practice, Mental health, Qualitative research, Evidence based practice                                                                                                                                                                                                                                                                                                                         |
| Keywords:                       | PRIMARY CARE, Organisation of health services < HEALTH SERVICES ADMINISTRATION & MANAGEMENT, MENTAL HEALTH, Child & adolescent psychiatry < PSYCHIATRY, QUALITATIVE RESEARCH                                                                                                                                                                                                                                             |
|                                 |                                                                                                                                                                                                                                                                                                                                                                                                                          |

SCHOLARONE™  
Manuscripts

1  
2  
3  
4  
5 **TITLE:** Protocol for the mixed methods Managing young people with Attention deficit hyperactivity  
6 disorder in Primary care (MAP) study: mapping current practice and co-producing guidance to  
7 improve healthcare in an underserved population.  
8  
9

10  
11  
12  
13 **SHORT STUDY TITLE:** Managing young people with ADHD in primary care (MAP) study  
14  
15

16 Authors

17 Anna Price<sup>1</sup>, Jane R. Smith<sup>1</sup>, Faraz Mughal<sup>2,3</sup>, Anita Salimi<sup>1</sup>, G J Melendez-Torres<sup>1</sup>, Tamsin Newlove-  
18 Delgado<sup>1</sup>  
19

20  
21 <sup>1</sup>University of Exeter Medical School, Exeter, EX1 2LU, UK.  
22

23 <sup>2</sup>School of Medicine, Keele University, Keele, ST5 5BG  
24

25 <sup>3</sup>NIHR Greater Manchester Patient Safety Translational Research Centre, Keele University, Keele  
26  
27

28 Corresponding author:

29 Dr Anna Price,

30 School for Primary Care Research,

31 University of Exeter Medical School,  
32

33 South Cloisters  
34

35 St Luke's Campus,  
36

37 Exeter,  
38

39 EX1 2LU,  
40

41 Email: [a.price@exeter.ac.uk](mailto:a.price@exeter.ac.uk)  
42

43 01392 726026  
44  
45  
46  
47  
48

49 **Key words:** Attention Deficit Hyperactivity Disorder (ADHD), Primary Care, Mixed-methods, Co-  
50 production.  
51

52 **Protocol Version:** 1 Date: 18/05/2022  
53

54 **Word count:** 3861 (not including title page, abstract, references, figures, tables, or acknowledgments)  
55  
56  
57  
58  
59  
60

## ABSTRACT

**Introduction:** Attention deficit hyperactivity disorder (ADHD) is the most common neurodevelopmental disorder in children and adolescents, with an average worldwide prevalence of 5%. Up to 40% of young people continue to experience symptoms into adulthood. Young people with ADHD experience poorer outcomes than their peers across multiple domains, with treatment shown to reduce these risks. Primary care practitioners play an important role in healthcare provision for this group in the UK. However, many feel unsure about how best to provide support, reporting prescribing concerns and need for more evidence-based guidance. A lack of national data on primary care provision hinders efforts to improve access to care and optimise outcomes. This mixed-methods study aims to provide evidence that may be used to improve primary care services for young people aged 16-25 years with ADHD.

**Methods and analysis:** There are three interlinked work packages: (1) A mapping study including a survey of stakeholders (healthcare professionals, people with ADHD, and commissioners) will map ADHD prescribing practice, shared-care arrangements, available support, and practitioner roles by geographic locations across England for different respondent groups. (2) A qualitative study involving semi-structured interviews with stakeholders (10-15 healthcare professionals and 10-15 people with ADHD) will explore experiences of 'what works' and 'what is needed' in terms of service provision and synthesise findings. (3) Workshops will integrate findings from (1) and (2) and work with stakeholders to use this evidence to co-develop key messages and guidance to improve care.

**Ethics and dissemination:** The protocol has been approved by Yorkshire and the Humber – Bradford Leeds Research Ethics Committee. Recruitment commenced in September 2022. Findings will be disseminated via research articles in peer-reviewed journals, conference presentations, public involvement events, patient groups, and media releases. A summary of study findings will be shared with participants at the end of the study.

**Registration:** ClinicalTrials.gov: trial number NCT05518435.

### Strengths and limitations of this study

- A national study, incorporating data from a broad range of stakeholders, including healthcare professionals, people with lived experience of ADHD (e.g., young people with ADHD and their supporters) and commissioners
- Addresses the evidence gap on current primary care provision for young people with ADHD in England, including identifying geographic variations in care, and understanding what works, and what is needed
- Comprehensive patient and public involvement, with study design inspired by patients who said that referrals, prescribing, and other support from primary care staff (such as GPs) are key to young people managing living with ADHD
- Co-production of guidance for primary care providers, informed by healthcare professionals and people with lived experience of ADHD
- A limitation is the use of convenience (non-probabilistic) sampling methods for surveying some stakeholder groups, meaning it will not be possible to say how well responses represent the target population



## INTRODUCTION

### Background

ADHD is the most common neurodevelopmental disorder in children and adolescents, with an average worldwide prevalence of 5%,<sup>[1]</sup>. Up to 40% of young people with ADHD will continue to experience symptoms into adulthood,<sup>[2]</sup>, which can affect physical and mental health, further education, work, relationships, involvement with criminal justice, and mortality, with ensuing economic impacts on the individual and society,<sup>[1, 3]</sup>. A recent UK surveillance study estimated that the annual number of people aged 17–19 years with an ongoing need for ADHD medication lies between 270 and 599 per 100,000, with an even higher number requiring non-pharmacological support for their ADHD,<sup>[4]</sup>. Higher ADHD prevalence is associated with financial difficulties and economic disadvantage, resulting in higher service needs in some areas,<sup>[5]</sup>. The social and financial challenges of Covid-19 are likely to have intensified support needs, while also introducing new barriers to accessing health services. Treatment has been shown to reduce the risk of experiencing poorer outcomes in young people with ADHD,<sup>[1, 3]</sup>. Withdrawal of treatment in young people can have particularly profound effects, as this is a vulnerable life stage, when multiple simultaneous transitions are occurring,<sup>[6]</sup>.

### ADHD service provision

For young people with ADHD who require ongoing support into adulthood, UK National Institute for Health and Care Excellence (NICE) guidance recommends a smooth transition into adult services, with the prescribing and monitoring of ADHD medication carried out under shared care protocol arrangements between primary and secondary care services,<sup>[7]</sup>. However, the Children and Adolescents with ADHD in Transition between Children's and Adult Services (CATCh-uS) study estimated that less than a quarter of young people who needed ADHD medication made the transition to adult mental health services,<sup>[4]</sup>. This is likely to be due to a combination of factors, including the availability and accessibility of adult ADHD services, which vary widely, and a lack of information on, and preparation for, transition,<sup>[4, 8-12]</sup>. Even where medication is continued, management of ADHD may be sub-optimal without access to specialist assessment of ADHD, advice on titration, or non-pharmacological support,<sup>[13]</sup>.

The variation in services and support for young people (aged 16-25 years) with ADHD creates inequities in access and increases pressure on primary care,<sup>[8-10]</sup>. As a result, general practitioners (GPs) may end up providing care for young people with ADHD 'by default' due to long waiting times, a lack of adult services, or because a person does not meet service eligibility criteria,<sup>[10-12]</sup>; with some GPs reporting concerns about safety, risk and responsibility and workload,<sup>[10]</sup>. Variations in prescribing protocols and classification of ADHD drugs in local formularies,<sup>[10]</sup> means some young people may also have difficulties registering with a GP willing to prescribe. Young people with ADHD have expressed a lack of confidence in primary care to help them manage their condition, and report frustration with the information provided by GPs and the support available,<sup>[11, 12, 14, 15]</sup>.

### Primary care

Debates over how to tackle a 'failure of healthcare' for ADHD, especially at transition, often include an expanded role for primary care through recently established primary care networks (PCNs) of GP practices,<sup>[6, 16]</sup>. NICE recommend further studies about the role of primary care in supporting young people discharged from children's services,<sup>[17]</sup>. Challenges around shared care and guidance

1  
2  
3  
4  
5  
6 implementation have been recognised by working groups established by the UK Adult ADHD Network  
7 (UKAAN), and NHS England,[6]. There is currently no overview or map of the different models of care  
8 and roles that exist in primary care to support people with ADHD, though our own and others'  
9 qualitative research has highlighted variations in prescribing practice and shared care models,[16].  
10 NHS England's mandate to strengthen primary care and reduce inequalities, needs to be met through  
11 consulting with patients and the public, and using the patient pathway approach,[18]. However, the  
12 current lack of national level data mapping pathways in primary care for young people with ADHD, is  
13 hindering efforts to optimise outcomes for this underserved group.  
14  
15

## 16 **Co-production**

17  
18 Co-production which can be defined as ways of working that involve people using health services,  
19 carers, practitioners, and the wider community, is increasingly seen as critical for research aiming to  
20 strengthen health and care systems,[19, 20]. This rapidly evolving methodology within health and  
21 social care research, which is advocated and supported by the National Institute for Health and Care  
22 Research (NIHR),[19], is characterised by key principles of:  
23

- 24 • the sharing of power (so that research is jointly owned by those involved),
- 25 • including all perspectives and skills (so that all those who can contribute are included), and
- 26 • respecting and valuing the knowledge of all those working together (with equal importance).  
27  
28

29  
30 The Five Year Forward View for Mental Health,[21] called for development of evidence-based  
31 approaches to co-production in commissioning. The NHS Long Term Plan,[22] also emphasises the  
32 importance of working collaboratively to find solutions to address unmet health and social care  
33 needs. Therefore, research aiming to provide evidence to tackle identified 'failures' in NHS healthcare  
34 provision for young people with ADHD needs to involve stakeholders who can contribute varied  
35 knowledge and experience throughout the research process.  
36

## 37 **RATIONALE**

38  
39 This research has been developed in response to identified gaps in the literature and existing services  
40 (as outlined above), and priorities highlighted by people with ADHD. The research team includes  
41 young people with ADHD whose input will help ensure the research is sensitive and relevant, an  
42 academic GP to ensure identified solutions are deliverable within primary care settings. Also, our  
43 research advisory groups (RAGs), made up of healthcare practitioners and young people with ADHD  
44 and their supporters.  
45

46  
47 Under the NHS Long Term plan,[22] and NHS Mental Health Implementation plan,[23] the recent  
48 formation of PCNs in combination with the establishment of NHS integrated care systems (ICSs)  
49 (partnerships of organisations that come together to plan and deliver joined up health and care  
50 services), represents an opportunity to establish new and effective working practices to enable  
51 consistent and accessible healthcare for all young people with ADHD. The NHS Community Mental  
52 Health Framework,[24] also sets out a vision for how community services should modernise to offer  
53 joined-up-care for those with mental health needs, within ICSs. The evidence base outlined above,  
54 and current guidelines,[7] highlight the key role primary care services have to play in the provision of  
55 healthcare for young people with ADHD. Not only are primary care practitioners, such as GPs, often  
56 the gatekeepers through the referral system to secondary care services, such as adult mental health  
57 and specialist ADHD services, but NICE guidelines recommend that they also provide healthcare  
58 support such as routine monitoring, and prescribing of medication under shared care agreements  
59 with secondary care services,[7].  
60

1  
2  
3  
4  
5  
6 Furthermore, primary care services have an increasing role to play in terms of providing mental health  
7 and wellbeing support to young people with ADHD, with additional roles such as mental health  
8 workers and social prescribing link workers funded through PCNs,[25]. However, the challenges for  
9 primary care in delivering co-ordinated and accessible healthcare for young people with ADHD, need  
10 to be better understood.  
11

12 Currently, little is known about whether or how services are provided for young people with ADHD in  
13 primary care in England, or about areas of good practice, and optimal models and pathways for  
14 improving access to healthcare for this underserved group. While the NHS Long Term Plan,[22] aims  
15 to dissolve the historic divide between primary and secondary/specialist care, delivering healthcare  
16 across systems remains challenging. For example, existing evidence indicates that GPs can feel  
17 unsupported and uncertain about providing medication under shared care agreements,[10, 26].  
18

19 In line with current need, the aim of this research is therefore to map current services and provide an  
20 evidence-base to inform co-produced guidance to improve primary care for young people aged 16-25  
21 years with ADHD. The objectives are to:  
22

- 23 1. Develop a national map and overview of current primary care pathways and prescribing  
24 practice in the management of young people with ADHD
- 25 2. Explore:
  - 26 ○ Primary care providers and related organisations' needs for prescribing support in their  
27 roles managing care for young people with ADHD
  - 28 ○ The expectations and needs of young people regarding ADHD support, information,  
29 and management in primary care
- 30 3. Co-produce evidence informed guidance to better co-ordinate primary care and improve  
31 accessibility for young people with ADHD, based on discussions around integrated findings  
32 from objectives 1 and 2  
33

## 34 **METHODS AND ANALYSIS**

### 35 **Overview**

36 This mixed-methods study consists of three work packages to address the three objectives outlined  
37 above: a national survey, qualitative interviews, and integration of findings to support co-production  
38 of guidance. Participants in each will include people aged 16 or over with lived experience of ADHD  
39 (and their supporters), health professionals with a focus on primary care (such as GPs, nurses, mental  
40 health practitioners, and clinical pharmacists), and primary care commissioners/providers. Sampling,  
41 recruitment strategies, and eligibility criteria, vary slightly between work packages. For details of  
42 eligibility criteria by work package (WP), see figure 1.  
43

44 >>Insert figure 1 here<<  
45

46 The research will be guided and informed throughout by six-monthly meetings with two research  
47 advisory groups (RAGs) made up of a diverse mix of primary healthcare practitioners, and young  
48 people with ADHD and their parents/carers. These will be a practice and policy research advisory  
49 group (P-RAG), and a young person and parent/carer research advisory group (Y-RAG).  
50

1  
2  
3  
4  
5  
6 Named research partners will support delivery of the research, including advising on delivery of the  
7 research and dissemination of results. These include the ADHD Foundation, the UK Adult ADHD  
8 Network (UKAAN), NIHR Clinical Research Network South West Peninsula, and Devon Partnership NHS  
9 Trust (DPT).

## 10 11 **Work package one (WP1) Survey**

### 12 13 Design

14 A mapping study will involve a national online survey of primary care provision for young people and  
15 adults with ADHD in England. Informants will be sampled from three key stakeholder groups - service  
16 users, healthcare professionals, and commissioners/providers - via a mixture of convenience and  
17 purposive techniques. The target sample size will be a minimum of 252 participants in total (providing  
18 a minimum of six responses for each ICS in England). The survey will be open for up to 16 weeks.  
19 Responses will be reviewed part-way through this period, with subsequent survey promotion and  
20 reminders targeted to achieve a balanced mix of responses by geographic location and stakeholder  
21 group. The survey will use the seven-step pragmatic health service mapping method, developed  
22 through extensive patient and public involvement,[27], and previously used to map adult mental  
23 health service availability for adults with ADHD in England in 2018,[9].

### 24 25 26 27 Participants

28 Participants located across England will be invited to participate via direct email, social media, partner  
29 organisation mailing lists, and organisation newsletters and websites. For eligibility criteria, see figure  
30 1.  
31

### 32 33 Data collection

34 Data will be collected online via a certified GDPR compliant online survey tool; Qualtrics® (Provo, UT,  
35 USA. <https://www.qualtrics.com>). The survey will include demographic questions about the  
36 respondent's role, location, and any practice/organisation they are linked to, and core research  
37 questions (see figure 2) exploring current primary care practice in relation to the NICE [7] guidelines  
38 for diagnosis and management of ADHD. The survey will be designed (and programmed) so that  
39 respondents will be taken to different questions, depending on the stakeholder group that they  
40 primarily identify with. Final survey wording will be piloted and agreed in consultation with study  
41 RAGs.  
42  
43  
44

45  
46 >>Insert figure 2 here<<  
47  
48

### 49 50 Analysis

51 Data will be analysed using Stata® SE15 (StataCorp LP, College Station, TX, USA). Descriptive statistics  
52 will be used to summarise respondent characteristics by geographic location and stakeholder group. A  
53 full data analysis and presentation plan will be developed and informed by discussions with study  
54 RAGs. Variation by stakeholder group and local area characteristics (e.g., rural/urban, ethnic mix,  
55 socio-economic status) will be summarised and tabulated by geographic unit. The unit size (e.g., PCN,  
56 ICS, NHS Region) used in each analysis will be dependent on the volume of available data, and  
57 whether an analysis at the stated level will provide meaningful information, following consultation  
58 with stakeholder groups. Where appropriate, data will be presented on a map of England using a  
59  
60

1  
2  
3  
4  
5 geographic information system (QGIS 3.24), illustrating variation by region or other geographic unit  
6 on prescribing practice, shared care, specialist support etc. Accessible visual tools, such as Google®  
7 My Map, will be used to communicate findings with stakeholders.  
8  
9

## 10 **Work package two (WP2) Qualitative**

### 11 Design

12  
13 A qualitative study consisting of semi-structured interviews (or focus-groups) with a sample of 10-15  
14 young people with ADHD and their supporters, and 10-15 primary care professionals/commissioners  
15 from a range of geographic locations in England. The number of locations (between three and six) and  
16 boundaries (e.g., GP surgery, PCN, or ICS) will be decided based on findings from WP1. Locations will  
17 be purposively chosen (informed by findings from WP1) to reflect a variety of local approaches to  
18 primary care practice for treatment and support of ADHD. These might for example include a GP  
19 surgery serving university students, or an urban surgery with a GP who has a special interest in mental  
20 health.  
21  
22

### 23 Participants

24  
25 Participants will be purposely sampled to include of a diverse mix of young people with ADHD and  
26 their parent/carers, health professionals, and commissioners/providers of NHS services for ADHD. For  
27 eligibility criteria, see figure 1.  
28  
29

### 30 Data collection

31  
32 Data will be collected using semi-structured interviews/focus-groups that follow topic guides  
33 developed and refined in consultation with the RAGs (see supplementary files 1 and 2). Topic guides  
34 will be iteratively adjusted and will contain similar prompts for interviews and focus groups. For  
35 health professionals, these will cover perspectives on their role in managing young people with ADHD,  
36 needs for support with prescribing and other aspects of management, the information they need in  
37 terms of format, content and timing, their awareness of existing information resources and their  
38 preferences regarding access to and use of information in their role. For young people, these will  
39 cover perspectives on their experiences of support from primary care, their expectations from  
40 primary care consultations and the information and signposting needed to access care. Topic guides  
41 will also cover the following content:  
42  
43

- 44 • Background on participant's current ADHD/healthcare context
- 45 • Experiences of
  - 46 ○ Care and support for ADHD through primary care
  - 47 ○ Support for wider mental and physical health need of people with ADHD through  
48 primary care
- 49 • Adjustments to help people with ADHD access primary care
- 50 • Experiences of primary care consultations
- 51 • Information and resources that might improve provision and accessibility of healthcare for  
52 young people with ADHD through primary care
- 53
- 54
- 55
- 56
- 57

58 Interviews/focus-groups will be conducted using a variety of mediums (e.g., online meetings, by  
59 telephone, or face-to-face), depending on the needs and preferences of participants. This flexible  
60 approach draws on evidence that respondents' experience of control and choice affects take up of



1  
2  
3  
4  
5 studies [28]. It is also designed to accommodate the communication preferences and needs of young  
6 people with ADHD and their supporters and takes account of the limited availability of healthcare  
7 professionals, thus maximising the inclusivity of the research. Where individual interviews are not  
8 feasible due to resource or time constraints (for example from a busy primary care team), focus-  
9 groups will be conducted to collect data. Focus groups may also generate richer data in some  
10 circumstances, for example when discussing care pathways potentially involving multiple roles.  
11

### 12 13 Analysis

14  
15 Data from WP2 will be managed in NVivo (QSR International, Warrington, UK), and analysed using  
16 reflexive thematic analysis (RTA),[29, 30]. A codebook approach will be used to structure findings and  
17 provide insights suitable for applied policy research,[29, 31, 32]. The research process will be  
18 informed by an acknowledgement of the researcher's active role in knowledge production, and a  
19 recognition of the interpretive nature of data coding,[29]. The framework method,[32-34], will be  
20 used to generate themes reflexively through a process of inductive and deductive analyses, and a  
21 combination of semantic and latent coding,[35]. The analysis will be underpinned by a critical realist  
22 perspective. This reflexive theoretical stance will highlight the context of the data, and the influence  
23 of researcher and stakeholder perspectives, providing a nuanced interpretation of meaning suitable  
24 to inform the co-production of guidance (in WP3).  
25

26  
27 An understanding of the need for information resources and prescribing and healthcare support will  
28 be developed within a range of different geographical and socio-economic contexts, and different  
29 models of care.  
30

### 31 32 **Work package three (WP3) Co-production**

#### 33 34 Design

35  
36 Co-production methods consisting of a series of consultations, will be conducted in line with national  
37 standards for public involvement,[36] and following national guidance on co-producing a research  
38 project,[19]. The outline design for WP3 will be refined through consultation with the RAGs, research  
39 partners, and shaped following integration of findings from WP1 and WP2 into emerging themes and  
40 priority areas. A flexible research design, informed by previously documented co-production  
41 methods,[37] will enable participants to co-produce guidance using available evidence, to improve  
42 primary care for young people with ADHD.  
43

#### 44 45 Participants

46  
47 There will be between six and 16 participants, reflecting a diversity of roles and experience including  
48 young people with ADHD (and their parents/carers), health professionals, and members of the  
49 research team. The number of participants will be kept small to enable flexible and interactive debate  
50 between participants. For eligibility criteria, see figure 1.  
51

#### 52 53 Data collection

54  
55 Data will be collected by means of between two and four workshops that build iteratively on each  
56 other; with additional discussion facilitated through meetings and emails. Workshops and meetings  
57 will be conducted using variety of mediums (e.g., online meetings, or face-to-face), depending on the  
58 needs and preferences of participants. WP3 will bring stakeholders together, providing space and  
59 time to consider and integrate evidence from WP1 and WP2, and to engage in discussions, refinement  
60 of ideas, and prioritisation setting exercises. The aim will be to produce accessible outputs designed

1  
2  
3  
4  
5 for communication with a variety of audiences (e.g., health professionals, service users and service  
6 commissioners/providers). Possible outputs include:  
7

- 8 • A map of patient pathways for young people accessing ADHD treatment and support through  
9 primary care,
- 10 • A geographic overview of primary care provision, including areas of good practice and gaps in  
11 accessible care
- 12 • Templates for information resources for primary care practitioners and young people,  
13 including a plan for further implementation
- 14 • Key messages for primary care practitioners and young people (e.g., what information do  
15 practitioners need to prescribe and titrate, what questions do young people want answers  
16 to?)
- 17 • Suggestions for innovative technology-supported solutions to assist healthcare providers and  
18 young people with addressing the challenges encountered when care spans primary and  
19 secondary care systems
- 20
- 21
- 22
- 23
- 24
- 25

26 Throughout WP3, the research team will maintain written records that chronicle and record  
27 information about the research process. Researchers will keep reflective diaries, recording tensions,  
28 sticking points and what is working well.  
29

### 30 Analysis

31  
32 WP3 will involve design followed by trialling and iterative refinement of integrated findings and co-  
33 produced outputs. A record will be kept of participant feedback on outputs. Co-produced guidance  
34 will be checked by research team members who have not been directly involved in the analysis, and  
35 with members of the RAGs, who will be asked to provide feedback on the output to verify its validity  
36 and consult on suitable methods of dissemination. Participant approved final versions of guidance and  
37 information will be disseminated as part of MAP study findings, using a variety of formats.  
38  
39

### 40 Outcomes

41  
42 The outcomes of this research will be shaped by close work with professionals and members of the  
43 community to ensure their relevance and utility. Anticipated outcomes include:  
44

- 45 • National overview of primary care provision for young people with ADHD across England,  
46 including:
  - 47 ○ Geographic map, showing variation in provision by NHS region or appropriate  
48 organisational boundaries
- 49 • Qualitative findings reflecting the perspectives of people involved in providing and in need of  
50 care, on the management of ADHD in primary care including:
  - 51 ○ Health professionals' needs for prescribing support
  - 52 ○ Young people with ADHD and their parent/carers' needs for healthcare and support  
53 with self-management
- 54 • Co-produced guidance on how to better design and co-ordinate primary care for young people  
55 aged 16-25 years with ADHD
- 56
- 57
- 58
- 59
- 60

1  
2  
3  
4  
5  
6  
7  
8  
9  
Research outcomes will be communicated to a range of academic, clinical, and lay audiences via a range of mediums including peer reviewed academic publications, lay summaries, presentations at academic and organisational conferences, and via the study website.

## 10 11 **Patient and Public Involvement**

12  
13  
14  
15  
16  
17  
18  
19  
20  
21  
22  
This proposal stemmed from requests made by participants in previous research [38] for information about GPs who prescribe for ADHD. Meetings between members of the research team and young people with ADHD, including AS who is an expert by experience and part of the research team, helped shaped the study design.

23  
24  
25  
26  
27  
28  
29  
30  
31  
32  
33  
34  
35  
36  
37  
38  
39  
Patient and public involvement in this research will be conducted in accordance with the NIHR National Standards for Public Involvement,[20]. It will follow a framework for involvement to include respect, support, transparency, responsiveness, fairness of opportunity, and accountability. People and the community will be involved in all stages of this research.

40  
41  
42  
43  
44  
45  
46  
47  
48  
49  
50  
51  
52  
53  
54  
55  
56  
57  
58  
59  
60  
Involvement and engagement of all stakeholders will be built into the culture of this research study and embedded in research processes through the following study structures:

- Core research group: inclusion of a young person with ADHD and an academic GP
- Research advisory groups (RAGs) meeting regularly to shape research progress:
  - Y-RAG, made up of young people with ADHD and their parent/carers
  - P-RAG made up of practitioners and service commissioners/providers
- Research partnerships: with service user and practitioners' organisations such the UK ADHD Foundation and Devon Partnership Trust (DPT)
- Research design: use of co-production methodology in WP3 to jointly generate guidance and outputs

## 61 62 **Data statement**

63  
64  
65  
66  
67  
68  
69  
70  
71  
72  
73  
74  
75  
76  
77  
78  
79  
80  
81  
82  
83  
84  
85  
86  
87  
88  
89  
90  
91  
92  
93  
94  
95  
96  
97  
98  
99  
100  
A technical appendix and dataset will be available from the lead author on request. Data will be stored in accordance with Exeter University's data storage policies. If agreed with the research team, qualitative data (from WP2 and WP3) will be deposited with the UK Data Service, for long-term preservation.

## 101 102 **ETHICS AND DISSEMINATION**

103  
104  
105  
106  
107  
108  
109  
110  
111  
112  
113  
114  
115  
116  
117  
118  
119  
120  
121  
122  
123  
124  
125  
126  
127  
128  
129  
130  
131  
132  
133  
134  
135  
136  
137  
138  
139  
140  
141  
142  
143  
144  
145  
146  
147  
148  
149  
150  
151  
152  
153  
154  
155  
156  
157  
158  
159  
160  
161  
162  
163  
164  
165  
166  
167  
168  
169  
170  
171  
172  
173  
174  
175  
176  
177  
178  
179  
180  
181  
182  
183  
184  
185  
186  
187  
188  
189  
190  
191  
192  
193  
194  
195  
196  
197  
198  
199  
200  
The protocol has been approved by the Yorkshire and the Humber – Bradford Leeds Research Ethics Committee (REC Reference: IRAS 313424). The study will be carried out in accordance with the Declaration of Helsinki (Fortaleza, Brazil, October 2013), the UK Policy Framework for Health and Social Care Research (2020) and the general principles of Good Clinical Practice E6 (R2). The study has been adopted by the National Institute for Health Research (NIHR) Clinical Research Network and has relevant local NHS research approvals. The trial is sponsored by the University of Exeter.

201  
202  
203  
204  
205  
206  
207  
208  
209  
210  
211  
212  
213  
214  
215  
216  
217  
218  
219  
220  
221  
222  
223  
224  
225  
226  
227  
228  
229  
230  
231  
232  
233  
234  
235  
236  
237  
238  
239  
240  
241  
242  
243  
244  
245  
246  
247  
248  
249  
250  
251  
252  
253  
254  
255  
256  
257  
258  
259  
260  
261  
262  
263  
264  
265  
266  
267  
268  
269  
270  
271  
272  
273  
274  
275  
276  
277  
278  
279  
280  
281  
282  
283  
284  
285  
286  
287  
288  
289  
290  
291  
292  
293  
294  
295  
296  
297  
298  
299  
300  
This research aims to answer a research question that is relevant and of importance to young people with ADHD, a currently underserved population in the UK. It is supported and informed by research advisors and partner organisations who represent the views and experiences of people with lived experience of ADHD, health professionals, and commissioners/providers. The collaborative research design will help to ensure that the research is conducted in a sensitive manner and will result in outputs that are appropriately communicated and useful.



## Amendments

Sponsor SOPs are being followed for amendments. Please note, it is anticipated that versions of study documents (e.g., Consent forms) may be updated following planned stakeholder engagement activities. Where documents are amended, HRA guidance on amending an approval will be followed, and advice and approval of the study sponsor will be sought on whether changes qualify as non-substantial or substantial amendments. In all cases, HRA processes will be followed, with documents updated in IRAS (using version control) and communicated to the REC (as appropriate).

For peer review only

## FUNDING

This project is funded by an NIHR Three School's Mental Health Research Fellowship (MHF008). AP and research project activities are funded by this fellowship. The grant is administered by the NIHR School for Primary Care Research. The study sponsor has seen, approved, and signed off the protocol. This project is supported by the NIHR Clinical Research Network South West Peninsula.

AP holds a Fellowship (award number MH008) funded by the Three NIHR Research Schools Mental Health Programme. FM is funded by a NIHR Doctoral Fellowship (NIHR300957) and is an affiliate of the NIHR Greater Manchester Patient Safety Translational Research Centre. This work was supported by the NIHR Greater Manchester Patient Safety Translational Research Centre (award number: PSTRC-2016-003). TND is funded by an NIHR Advanced Fellowship (NIHR300056). The views expressed are those of the author(s) and not necessarily those of the NIHR or the Department of Health and Social Care.

## Author declarations of competing interests

Dr Price, Dr Smith, Dr Mughal, Dr Salimi, Dr Melendez-Torres, and Dr Tamsin Newlove-Delgado have nothing to disclose.

## Contributor-ship statement

The research idea was inspired by and developed with people with ADHD and their supporters. The original research design stemmed from development work conducted by AP and TND. All authors actively contributed to the research design. AP, TND, and JS developed the protocol. AP leads the study, drafted the protocol ready for publication, and wrote the ethics submission. TND, JS, and GJMT provide research oversight and academic mentorship. FM is an academic GP and leads on healthcare professional representation and provides primary care expertise. AS leads on patient and public involvement (PPI) representation. All authors commented on the protocol and the manuscript, provided final approval for publication, and agree to be accountable for all aspects of the work in ensuring that questions related to the accuracy or integrity of any part of the work are appropriately investigated and resolved.

## Acknowledgements

We would like to thank all those who have contributed to this study, including the healthcare professionals, and people with ADHD and their supporters who have been involved in the conception and planning of this research. Also, the colleagues, collaborators, and research partners that have supported every aspect of this study.

## Exclusive Licence

I, the Submitting Author has the right to grant and does grant on behalf of all authors of the Work (as defined in the below author licence), an exclusive licence and/or a non-exclusive licence for contributions from authors who are: i) UK Crown employees; ii) where BMJ has agreed a CC-BY licence shall apply, and/or iii) in accordance with the terms applicable for US Federal Government officers or employees acting as part of their official duties; on a worldwide, perpetual, irrevocable, royalty-free basis to BMJ Publishing Group Ltd ("BMJ") its licensees and where the relevant Journal is co-owned by BMJ to the co-owners of the Journal, to publish the Work in BMJ Open and any other BMJ products and to exploit all rights, as set out in our licence.

1  
2  
3  
4  
5  
6 The Submitting Author accepts and understands that any supply made under these terms is made by  
7 BMJ to the Submitting Author unless you are acting as an employee on behalf of your employer or a  
8 postgraduate student of an affiliated institution which is paying any applicable article publishing  
9 charge (“APC”) for Open Access articles. Where the Submitting Author wishes to make the Work  
10 available on an Open Access basis (and intends to pay the relevant APC), the terms of reuse of such  
11 Open Access shall be governed by a Creative Commons licence – details of these licences and  
12 which Creative Commons licence will apply to this Work are set out in our licence referred to above.  
13  
14

### 15 **Figure legends**

16  
17 Figure 1. Participant eligibility criteria, by work package.

18  
19 Figure 2. Work package 1 (survey), core research questions.  
20  
21  
22  
23  
24  
25  
26  
27  
28  
29  
30  
31  
32  
33  
34  
35  
36  
37  
38  
39  
40  
41  
42  
43  
44  
45  
46  
47  
48  
49  
50  
51  
52  
53  
54  
55  
56  
57  
58  
59  
60

## REFERENCES

1. Sayal, K., et al., *Pathways to care in children at risk of attention-deficit hyperactivity disorder*. Br J Psychiatry, 2002. **181**(01): p. 43-8.
2. Faraone, S.V., J. Biederman, and E. Mick, *The age-dependent decline of attention deficit hyperactivity disorder: a meta-analysis of follow-up studies*. Psychol Med, 2006. **36**(2): p. 159-65.
3. Shaw, M., et al., *A systematic review and analysis of long-term outcomes in attention deficit hyperactivity disorder: effects of treatment and non-treatment*. BMC Med, 2012. **10**(1): p. 99.
4. Eke, H., et al., *Transition between child and adult services for young people with attention-deficit hyperactivity disorder (ADHD): findings from a British national surveillance study*. Br J Psychiatry, 2020. **217**(5): p. 616-622.
5. Prasad, V., et al., *Attention-deficit/hyperactivity disorder: variation by socioeconomic deprivation*. Arch Dis Child, 2019. **104**(8): p. 802-805.
6. Young, S., et al., *Recommendations for the transition of patients with ADHD from child to adult healthcare services: a consensus statement from the UK adult ADHD network*. BMC Psychiatry, 2016. **16**: p. 301.
7. NICE. *Attention deficit hyperactivity disorder: diagnosis and management (NG87)*. 2018 [cited 2019 29th March]; Available from: <https://www.nice.org.uk/guidance/ng87/chapter/Recommendations>.
8. Hall, C.L., et al., *Services for young people with attention deficit/hyperactivity disorder transitioning from child to adult mental health services: a national survey of mental health trusts in England*. J Psychopharmacol, 2015. **29**(1): p. 39-42.
9. Price, A., et al., *Mapping UK mental health services for adults with attention-deficit/hyperactivity disorder: national survey with comparison of reporting between three stakeholder groups*. BJPsych Open, 2020. **6**(4): p. e76.
10. Newlove-Delgado, T., et al., *Young people with attention deficit hyperactivity disorder in transition from child to adult services: a qualitative study of the experiences of general practitioners in the UK*. BMC Fam Pract, 2019. **20**(1): p. 159.
11. Matheson, L., et al., *Adult ADHD patient experiences of impairment, service provision and clinical management in England: a qualitative study*. BMC Health Serv Res, 2013. **13**: p. 184.
12. Newlove-Delgado, T., et al., *'You're 18 now, goodbye': the experiences of young people with attention deficit hyperactivity disorder of the transition from child to adult services*. Emotional and Behavioural Difficulties, 2018. **23**(3): p. 296-309.
13. Coghill, D.R., *Organisation of services for managing ADHD*. Epidemiol Psychiatr Sci, 2017. **26**(5): p. 453-458.
14. French, B., K. Sayal, and D. Daley, *Barriers and facilitators to understanding of ADHD in primary care: a mixed-method systematic review*. Eur Child Adolesc Psychiatry, 2019. **28**(8): p. 1037-1064.
15. Price, A., et al., *In transition with ADHD: the role of information, in facilitating or impeding young people's transition into adult services*. BMC psychiatry, 2019. **19**(1): p. 404.
16. Young, S., et al., *Failure of Healthcare Provision for Attention-Deficit/Hyperactivity Disorder in the United Kingdom: A Consensus Statement*. Front Psychiatry, 2021. **12**: p. 649399.
17. NICE. *Transition from children's to adults' services for young people using health or social care services (NG43)*. 2016 [cited 2019 3rd April]; Available from: <https://www.nice.org.uk/guidance/ng43>.
18. NHS England. *General practice forward view*. 2016 [cited 2021 3rd October]; Available from: <https://www.england.nhs.uk/publication/general-practice-forward-view-gpfv/>.
19. NIHR. *Guidance on co-producing a research project*. 2021 [cited 2022 8th March]; Available from: <https://www.learningforinvolvement.org.uk/?opportunity=nihr-guidance-on-co-producing-a-research-project>.
20. NIHR. *UK Standards for Public Involvement*. 2019 [cited 2022 8th March]; Available from: <https://sites.google.com/nihr.ac.uk/pi-standards/standards>.
21. NHS England. *Five year forward view*. 2014 [cited 2019 29th March]; Available from: <https://www.england.nhs.uk/publication/nhs-five-year-forward-view/>.
22. NHS England. *The NHS long term plan*. 2019 [cited 2022 26th February]; Available from: <https://www.longtermplan.nhs.uk/publication/nhs-long-term-plan/>.

- 1  
2  
3  
4  
5  
6  
7  
8  
9  
10  
11  
12  
13  
14  
15  
16  
17  
18  
19  
20  
21  
22  
23  
24  
25  
26  
27  
28  
29  
30  
31  
32  
33  
34  
35  
36  
37  
38  
39  
40  
41  
42  
43  
44  
45  
46  
47  
48  
49  
50  
51  
52  
53  
54  
55  
56  
57  
58  
59  
60
23. NHS England. *NHS mental health implementation plan*. 2019 [cited 2022 26th February]; Available from: <https://www.longtermplan.nhs.uk/publication/nhs-mental-health-implementation-plan-2019-20-2023-24/>.
  24. NHS England. *The Community Mental Health Framework for Adults and Older Adults*. 2019 [cited 2022 26th February]; Available from: <https://www.england.nhs.uk/mental-health/adults/cmhs/>.
  25. Naylor, C., et al., *Mental health and primary care networks: understanding the opportunities*. The King's Fund, 2020.
  26. Carrington, I.M. and J. McAloon, *Why shared-care arrangements for prescribing in attention deficit hyperactivity disorder may not be accepted*. *Eur J Hosp Pharm*, 2018. **25**(4): p. 222-224.
  27. Price, A., et al., *Seven steps to mapping health service provision: lessons learned from mapping services for adults with Attention-Deficit/Hyperactivity Disorder (ADHD) in the UK*. *BMC Health Serv Res*, 2019. **19**(1): p. 468.
  28. Catania, J.A., et al., *Effects of interviewer gender, interviewer choice, and item wording on responses to questions concerning sexual behavior*. *Public Opinion Quarterly*, 1996. **60**(3): p. 345-375.
  29. Braun, V. and V. Clarke, *Reflecting on reflexive thematic analysis*. *Qual Res Sport Exerc Health*, 2019. **11**(4): p. 589-597.
  30. Braun, V. and V. Clarke, *Using thematic analysis in psychology*. *Qualitative research in psychology*, 2006. **3**(2): p. 77-101.
  31. Smith, J. and J. Firth, *Qualitative data analysis: the framework approach*. *Nurse researcher*, 2011. **18**(2): p. 52-62.
  32. Ritchie, J., J. Lewis, and G. Elam, *Designing and selecting samples*. 2003: London: Sage.
  33. Gale, N.K., et al., *Using the framework method for the analysis of qualitative data in multi-disciplinary health research*. *BMC Med Res Methodol*, 2013. **13**: p. 117.
  34. Ritchie, J. and L. Spencer, *Qualitative data analysis for applied policy research*, in *Analyzing Qualitative Data*, A. Bryman and R. Burgess, Editors. 1994, Routledge: New York.
  35. Byrne, D., *A worked example of Braun and Clarke's approach to reflexive thematic analysis*. *Quality & Quantity*, 2021.
  36. HRA. *HRA Approval in Primary Care Settings – Principles of Study Set-Up*. 2017 [cited 2022 8th March]; Available from: <https://www.hra.nhs.uk/planning-and-improving-research/best-practice/nhs-site-set-up-in-england/>.
  37. Evans, B.A., et al., *A co-produced method to involve service users in research: the SUCCESS model*. *BMC Medical Research Methodology*, 2019. **19**(1): p. 34.
  38. Janssens, A., et al. *The transition from children's services to adult services for young people with attention deficit hyperactivity disorder: the CATCh-uS mixed-methods study*. 2020; Available from: <https://www.journalslibrary.nihr.ac.uk/hsdr/hsdr08420#/abstract>.

| Work package (WP)             | Inclusion criteria                                                                                                                                                                                                                                                                                                                                                                                                                                                                                                                                                                                                                                                                                              | Exclusion criteria                                                                                                                                                                                                                                                                                                                                                                                                               |
|-------------------------------|-----------------------------------------------------------------------------------------------------------------------------------------------------------------------------------------------------------------------------------------------------------------------------------------------------------------------------------------------------------------------------------------------------------------------------------------------------------------------------------------------------------------------------------------------------------------------------------------------------------------------------------------------------------------------------------------------------------------|----------------------------------------------------------------------------------------------------------------------------------------------------------------------------------------------------------------------------------------------------------------------------------------------------------------------------------------------------------------------------------------------------------------------------------|
| WP 1 (survey)                 | Identifies as one (or more) of the following: <ul style="list-style-type: none"> <li>• A person (aged 16 or over) with lived experience of ADHD, or</li> <li>• A supporter of a person with ADHD, or</li> <li>• A primary care health professional, or</li> <li>• A commissioner/provider of NHS primary care services</li> </ul> And <ul style="list-style-type: none"> <li>• Currently resident, working, or studying in England</li> </ul>                                                                                                                                                                                                                                                                   | <ul style="list-style-type: none"> <li>• Does not identify as a person aged 16 or over with ADHD, a supporter, a primary care health professional, or a commissioner/provider of NHS primary care services</li> <li>• Not currently resident, working, or studying in England</li> </ul>                                                                                                                                         |
| WP 2 (qualitative study)      | One (or more) of the following: <ul style="list-style-type: none"> <li>• A young person (aged 16-25) with ADHD, or</li> <li>• A supporter of a young person with ADHD, or</li> <li>• A primary care health professional, or</li> <li>• A commissioner/provider of NHS primary care services</li> </ul> And <ul style="list-style-type: none"> <li>• Currently resident or working in England</li> </ul> And <ul style="list-style-type: none"> <li>• Currently resident or working within the geographic locality of one of the qualitative study sites (sites to be decided based on findings from WP1)</li> </ul>                                                                                             | <ul style="list-style-type: none"> <li>• Not a young person with ADHD, a supporter, a primary care health professional, or a commissioner/provider of NHS primary care services</li> <li>• Not currently resident, working, or studying in England</li> <li>• Not currently resident, or working within the geographic locality of one of the qualitative study sites</li> </ul>                                                 |
| WP 3 (co-production research) | One (or more) of the following: <ul style="list-style-type: none"> <li>• A young person with lived experience of ADHD, or</li> <li>• A supporter of a young person with ADHD, or</li> <li>• A primary care health professional, or</li> <li>• A commissioner/provider of NHS primary care services</li> <li>• A member of the MAP study research team</li> </ul> And <ul style="list-style-type: none"> <li>• Currently resident or working in England</li> </ul> And <ul style="list-style-type: none"> <li>• Willing and able to work collaboratively and engage in consultations to co-produce evidence-based guidance for improving the co-ordination of primary care for young people with ADHD</li> </ul> | <ul style="list-style-type: none"> <li>• Not a young person with ADHD, a supporter, a primary care health professional, a commissioner/provider of NHS primary care services, or a member of the MAP study research team</li> <li>• Not currently resident, working, or studying in England</li> <li>• Not willing and able to work collaboratively and engage in consultations to co-produce evidence-based guidance</li> </ul> |

ADHD = Attention deficit hyperactivity disorder

MAP study = Managing young people with ADHD in primary care (MAP) study

Figure 1. Participant eligibility criteria, by work package.

213x279mm (72 x 72 DPI)

**Work package 1 (survey)****Core research questions:**

- Are adult ADHD medications prescribed via local primary care providers?
- Is a Shared Care Protocol in place to enable prescribing of adult ADHD medication locally through primary care?
- Is there an Adult Mental Health Service available to provide advice and support to local primary care providers in providing treatment and support for adult ADHD?
- Do local primary care providers:
  - Provide transitional support for young people with ADHD as they navigate the boundary between child and adult services?
  - Provide non-pharmacological support for young people with ADHD (such as mental health support, signposting, and provision of psychological interventions focused on ADHD)?
- What are the preferred methods for accessing information about treatment and support for young people with ADHD?
- What awareness is there of any additional or raised health risks associated with having ADHD?

Figure 2. Work package 1 (survey), core research questions.

196x138mm (72 x 72 DPI)



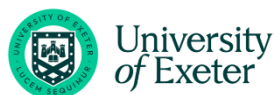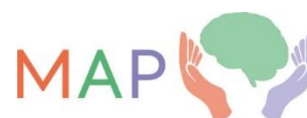

## Interview Topic Guide - WP2 (Health professionals and providers)

**Study title:** Managing young people with ADHD in primary care (MAP) study

**Chief Investigator:** Dr Anna Price [a.price@exeter.ac.uk](mailto:a.price@exeter.ac.uk). Telephone 01392 726026

*Please note this topic guide is for researchers only. This will be used to prompt questions during the interview. This is not a questionnaire. This topic guide will be adapted and refined following findings from WP1, and in consultation with MAP study research advisory groups.*

This interview aims to explore your experiences in relation to providing services and support for young people with ADHD in primary care (e.g., GP practice or local surgery). There will be a particular focus on factors that have made it easier and those that have made it harder to provide accessible and appropriate care. Also, on any recommendations you may have to improve access to primary care for young people with ADHD in the future.

### Demographics

1. **What is your primary role?** (e.g., GP, specialist nurse, PCN manager, pharmacist)
2. **What other roles also describe you?** (e.g., also have ADHD or also mental health lead for practice)
3. **How long have you been in your current role?**
4. **What is your geographic location?** (e.g., postcode of your workplace, or local GP practice)

### Research topic guides

#### 1. Current healthcare context

- a. What are your experiences of providing healthcare for young people and adults with ADHD? (Prompts: cover GP, specialist services, CAMHS, AMHS, psychological therapies)
- b. What other interests or experiences do you have that could relate to providing healthcare and support for people with neurodiverse conditions (e.g., ADHD, Autism) and/or mental health needs? (e.g., special interest, training, personal experience)
  - i. Do you have experience of providing transition support for young people with long term conditions?

#### 2. Providing care and support for ADHD through primary care

- a. Please tell us about your experiences of providing (or trying to provide) care for ADHD via your local primary care practice/network. (Prompts: prescriptions, diagnosis, referral, mental health support, physical health support, transition).
- a. What are your expectations and needs when conducting a primary care consultation, or providing other forms of healthcare support in relation to ADHD?
- b. How do you approach the patient's relationship with their parent/carer?

#### 3. Providing care and support for wider mental and physical health through primary care to people with ADHD



- a. Is there anyone at your local practice/PCN with a special interest in ADHD or mental health that can provide psychological or social support to someone with ADHD? (If so, what are your experiences in relation to this?)
- b. In addition to ADHD related needs, how would you consider/discuss a patient's wider mental health during a consultation, or when providing healthcare support?
- c. In addition to ADHD related needs, how would you consider/discuss a patient's wider physical health during a consultation, or when providing healthcare support?
- d. Are you aware of any physical health risks faced by people with ADHD? If so, do you address these when providing healthcare support for people with ADHD, and in which ways?  
(Prompts: awareness of risks re substance use, smoking, other risk -taking behaviours; any signposting to support or information that they undertake; harm reduction strategies etc.)

#### 4. Adjustments to help people with ADHD access primary care

- a. Is there anything that your service does to make it easier for young people with ADHD to access care and support through primary care? What changes could be made to make it easier for them to access care? (Prompts: physical location, online/face-to-face, appointment reminders)
- b. What can a primary care provider do to make it easier for young people with ADHD to attend appointments and get the help they need when they need it? (Prompts: any proactive management strategies, such as regular reviews, transition support appointments, provision of information)

#### 5. Support for primary care providers working with young people with ADHD

- a. What are the current challenges you face in providing care and support to young people with ADHD?
- b. Is there anything that your service could do to make it easier for you to provide care and support? What changes could be made to help you and your team/service to provide better care? (Prompts: financial incentives, training, staffing, information resources, decision making tools, care pathways, technology, digital resources)
- c. What can a primary care provider do to make it easier for young people with ADHD to attend appointments and get the help they need?

#### 6. Information and resources

- a. What kinds of information, resources or support do you need as a primary care provider to help you or your service?
  - i. Recognise possible ADHD symptoms
  - ii. Make appropriate referrals
  - iii. Prescribe through shared care
  - iv. Support YP through transition
  - v. Provide appropriate advice to patients in relation to self-management
  - vi. Signpost patients to high quality and evidence-based resources to help them
    1. Self-manage and understand living with adult ADHD.
    2. Access appropriate healthcare for ADHD.
    3. Access healthcare for wider physical and mental health needs

(Prompts: consider care pathways, contact details, resources on living with ADHD as an adult, transitioning with ADHD, signposting to local agencies)

## 7. Nationally available sources of healthcare, support, and information for self-management of ADHD

- a. What resources are you aware of? (Prompts: online, organisations, NHS website, social media, YouTube, friends, family) Do you ever signpost YP to them?
- b. If a selection of high-quality resources were available nationally, what would be most useful for your role? (e.g., information resources on NHS website, video stories, clinical decision-making tools, apps)

## 8. Learning from resources for treating other long-term conditions in primary care

- a. Are there any tools or resources available to you for other conditions (e.g., clinical decision apps) that could be adapted to support clinicians providing support to a young person with ADHD? Or for young people themselves to use?
- b. If so, please can you describe?

## 9. Feedback on information resource examples

- a. What is your preferred method for gaining information about treatment and support for adult ADHD? (Researcher to share examples and seek feedback)

## 10. Reflection/Close

- a. If you spoke to someone in primary care providing healthcare for a young adult with ADHD, what advice would you give to them:
  - i. about making sure YP with ADHD get the treatment and support they need?
  - ii. about useful resources for YP?
  - iii. about questions to ask a young person, and the best ways of listening?
- b. If you spoke to a young person with ADHD who needed to access healthcare for their ADHD through their primary care provider, what advice would you give to them:
  - iv. about medication?
  - v. about who to talk to in the practice?
  - vi. what to say to their GP, and which questions to ask?

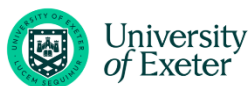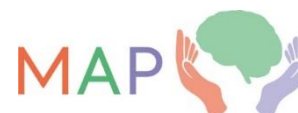

## Interview Topic Guide – WP2 (Young people and parents/carers)

**Study title:** Managing young people with ADHD in primary care (MAP) study

**Chief Investigator:** Dr Anna Price [a.price@exeter.ac.uk](mailto:a.price@exeter.ac.uk). Telephone 01392 726026

*Please note this topic guide is for researchers only. This will be used to prompt questions during the interview. This is not a questionnaire. This topic guide will be adapted and refined following findings from WP1, and in consultation with MAP study research advisory groups.*

This interview aims to explore your experiences in relation to accessing services and support for ADHD through a primary care provider (e.g., GP practice or local surgery). There will be a particular focus on factors that have made it easier and those that have made it harder to access care. Also, on any recommendations you may have to improve access to primary care for young people with ADHD in the future.

### Demographics

1. **What is your primary role?** (e.g., young person (YP) with ADHD or parent/carer)
2. **What other roles also describe you?** (e.g., also, a health worker, student)
3. **What is your age (or the age of the YP if you are a parent/carer)?**
4. **What is your geographic location?** (e.g., postcode of your workplace, address, or postcode of local GP practice)

### Research topic guides

#### 1. Current healthcare context

- a. What are your experiences of accessing healthcare for ADHD? (Prompts: cover GP, specialist services, CAMHS, AMHS, psychological therapies)
- b. Do you (or does your child) have any co-existing mental health problems? If so, what are your experiences of accessing care for these?
- c. Do you (or does your child) have any co-existing physical health problems? If so, what are your experiences of accessing care for these?

#### 2. Accessing care and support for ADHD through primary care

- a. Please tell us about your experiences of accessing (or trying to access) care for ADHD via your local primary care practice. (Prompts: prescriptions, diagnosis, referral, mental health support, physical health support, transition).
- b. What are your expectations and needs from a consultation, or other support in primary care in relation to your ADHD?
- c. What role does your parent/carer have in helping you to access care and support? (Or what role do you have as a parent/carer, and what role does the young person take)

#### 3. Accessing care and support for wider mental and physical health through primary care when you have ADHD

- a. Is there anyone at your local practice with a special interest in ADHD or mental health that you can talk to if you need psychological support? (If so, what are your experiences in relation to this?)
- b. Have you had a chance to discuss your mental health more widely with your primary care provider?

- c. Have you had a chance to discuss your physical health more widely with your primary care provider?
- d. Are you aware of any health risks faced by people with ADHD? If so, have you had a chance to discuss these with your primary care provider? (Prompts: awareness of risks re substance use, smoking, other risk-taking behaviours; any signposting to support or information that they undertake; harm reduction strategies etc.)

#### 4. Adjustments for accessing primary care support when you have ADHD

- a. What have your experiences been trying to get an appointment with your GP?
- b. Is there anything about your ADHD that makes it harder to access care and support through your GP? What would make it easier for you to access care? (Prompts: physical location, online/face-to-face, appointment reminders)
- c. What can your primary care provider do to make it easier for you to attend an appointment and get the help you need?

#### 5. Information and resources needed to help with management and self-management of ADHD

- a. What kinds of information and resources do you need from your primary care provider? (Prompts: about care pathways, contact details, living with ADHD as an adult, transitioning with ADHD, resources, signposting to local agencies). To help you:
  - i. Recognise possible ADHD symptoms
  - ii. Get a referral to a specialist service
  - iii. Get your prescriptions
  - iv. Have the support you need through transition
- b. And more generally...
  - i. Manage and understand living with adult ADHD.
  - ii. Access the healthcare you need for your ADHD.
  - iii. Understand and access physical and mental healthcare support that is not directly related to your ADHD

(Prompts: videos, visual diagrams, website links, signposting to services, meetings, people, resources on living with ADHD as an adult, transitioning with ADHD)

#### 6. Other sources of healthcare, support, and information for management and self-management of ADHD

- a. What resources have you accessed? (Prompts: online, organisations, NHS website, social media, YouTube, friends, family)
  - i. Can you provide positive and negative examples of your experience of accessing support through these other methods?
  - ii. Is there anything that primary care providers could learn from your experiences with these other resources?

#### 7. Feedback on information resource examples

- a. What is your preferred method for gaining information about treatment and support for adult ADHD? (Researcher to share examples and seek feedback)

#### 8. Reflection/Close

- a. If you spoke to someone in primary care providing healthcare for a young adult with ADHD, what advice would you give to them?

- 1  
2  
3  
4  
5  
6  
7  
8  
9  
10  
11  
12  
13  
14  
15  
16  
17  
18  
19  
20  
21  
22  
23  
24  
25  
26  
27  
28  
29  
30  
31  
32  
33  
34  
35  
36  
37  
38  
39  
40  
41  
42  
43  
44  
45  
46  
47  
48  
49  
50  
51  
52  
53  
54  
55  
56  
57  
58  
59  
60
- i. about making sure YP with ADHD get the treatment and support they need?
  - ii. about useful resources for YP?
  - iii. about questions to ask a young person, and the best ways of listening?
- b. If you spoke to a young person with ADHD who needed to access healthcare for their ADHD through their primary care provider, what advice would you give to them?
- iv. about medication?
  - v. about who to talk to in the practice?
  - vi. about what to say to their GP, and which questions to ask?

For peer review only

# BMJ Open

**Protocol for the mixed methods Managing young people (aged 16-25) with Attention deficit hyperactivity disorder in Primary care (MAP) study: mapping current practice and co-producing guidance to improve healthcare in an underserved population.**

|                                 |                                                                                                                                                                                                                                                                                                                                                                                                                          |
|---------------------------------|--------------------------------------------------------------------------------------------------------------------------------------------------------------------------------------------------------------------------------------------------------------------------------------------------------------------------------------------------------------------------------------------------------------------------|
| Journal:                        | <i>BMJ Open</i>                                                                                                                                                                                                                                                                                                                                                                                                          |
| Manuscript ID                   | bmjopen-2022-068184.R2                                                                                                                                                                                                                                                                                                                                                                                                   |
| Article Type:                   | Protocol                                                                                                                                                                                                                                                                                                                                                                                                                 |
| Date Submitted by the Author:   | 01-Jun-2023                                                                                                                                                                                                                                                                                                                                                                                                              |
| Complete List of Authors:       | Price, Anna; University of Exeter Medical School<br>Smith, Jane; University of Exeter Medical School<br>Mughal, Faraz; Keele University School of Medicine; NIHR Greater Manchester Patient Safety Translational Research Centre, Keele University<br>Salimi, Anita; University of Exeter Medical School<br>Melendez-Torres, G.J; University of Exeter,<br>Newlove-Delgado, Tamsin ; University of Exeter Medical School |
| <b>Primary Subject Heading</b>: | Health services research                                                                                                                                                                                                                                                                                                                                                                                                 |
| Secondary Subject Heading:      | General practice / Family practice, Mental health, Qualitative research, Evidence based practice                                                                                                                                                                                                                                                                                                                         |
| Keywords:                       | PRIMARY CARE, Organisation of health services < HEALTH SERVICES ADMINISTRATION & MANAGEMENT, MENTAL HEALTH, Child & adolescent psychiatry < PSYCHIATRY, QUALITATIVE RESEARCH                                                                                                                                                                                                                                             |
|                                 |                                                                                                                                                                                                                                                                                                                                                                                                                          |

SCHOLARONE™  
Manuscripts

**TITLE:** Protocol for the mixed methods, Managing young people (aged 16-25) with Attention deficit hyperactivity disorder in Primary care (MAP) study: mapping current practice and co-producing guidance to improve healthcare in an underserved population.

**SHORT STUDY TITLE:** Managing young people with ADHD in primary care (MAP) study

Authors

Anna Price<sup>1</sup>, Jane R. Smith<sup>1</sup>, Faraz Mughal<sup>2,3</sup>, Anita Salimi<sup>1</sup>, G J Melendez-Torres<sup>1</sup>, Tamsin Newlove-Delgado<sup>1</sup>

<sup>1</sup>*University of Exeter Medical School, Exeter, EX1 2LU, UK.*

<sup>2</sup>*School of Medicine, Keele University, Keele, ST5 5BG*

<sup>3</sup>*NIHR Greater Manchester Patient Safety Translational Research Centre, Keele University, Keele*

Corresponding author:

Dr Anna Price,  
School for Primary Care Research,  
University of Exeter Medical School,  
South Cloisters  
St Luke's Campus,  
Exeter,  
EX1 2LU,  
Email: [a.price@exeter.ac.uk](mailto:a.price@exeter.ac.uk)  
01392 726026

**Key words:** Attention Deficit Hyperactivity Disorder (ADHD), Primary Care, Mixed-methods, Co-production.

**Protocol Version:** 1 Date: 18/05/2022

**Word count:** 3861 (not including title page, abstract, references, figures, tables, or acknowledgments)



## ABSTRACT

**Introduction:** Attention deficit hyperactivity disorder (ADHD) is the most common neurodevelopmental disorder in children and adolescents, with an average worldwide prevalence of 5%. Up to 40% of young people continue to experience symptoms into adulthood. Young people with ADHD experience poorer outcomes than their peers across multiple domains, with treatment shown to reduce these risks. Primary care practitioners play an important role in healthcare provision for this group in the UK. However, many feel unsure about how best to provide support, reporting prescribing concerns and need for more evidence-based guidance. A lack of national data on primary care provision hinders efforts to improve access to care and optimise outcomes. This mixed-methods study aims to provide evidence that may be used to improve primary care services for young people aged 16-25 years with ADHD.

**Methods and analysis:** There are three interlinked work packages: (1) A mapping study including a survey of stakeholders (healthcare professionals, people with ADHD, and commissioners) will map ADHD prescribing practice, shared-care arrangements, available support, and practitioner roles by geographic locations across England for different respondent groups. (2) A qualitative study involving semi-structured interviews with stakeholders (10-15 healthcare professionals and 10-15 people with ADHD) will explore experiences of 'what works' and 'what is needed' in terms of service provision and synthesise findings. (3) Workshops will integrate findings from (1) and (2) and work with stakeholders to use this evidence to co-develop key messages and guidance to improve care.

**Ethics and dissemination:** The protocol has been approved by Yorkshire and the Humber – Bradford Leeds Research Ethics Committee. Recruitment commenced in September 2022. Findings will be disseminated via research articles in peer-reviewed journals, conference presentations, public involvement events, patient groups, and media releases. A summary of study findings will be shared with participants at the end of the study.

**Registration:** ClinicalTrials.gov: trial number NCT05518435.



### Strengths and limitations of this study

- An English study, incorporating data from a broad range of stakeholders, including healthcare professionals, people with lived experience of ADHD (e.g., young people with ADHD and their supporters) and commissioners
- Addresses the evidence gap on current primary care provision for young people with ADHD in England, including identifying geographic variations in care, and understanding what works, and what is needed
- Comprehensive patient and public involvement, with study design inspired by patients who said that referrals, prescribing, and other support from primary care staff (such as GPs) are key to young people managing living with ADHD
- Co-production of guidance for primary care providers, informed by healthcare professionals and people with lived experience of ADHD
- A limitation is the use of convenience (non-probabilistic) sampling methods for surveying some stakeholder groups, meaning it will not be possible to say how well responses represent the target population

## INTRODUCTION

### Background

ADHD is the most common neurodevelopmental disorder in children and adolescents, with an average worldwide prevalence of 5%,<sup>[1]</sup>. Up to 40% of young people with ADHD will continue to experience symptoms into adulthood,<sup>[2]</sup>, which can affect physical and mental health, further education, work, relationships, involvement with criminal justice, and mortality, with ensuing economic impacts on the individual and society,<sup>[1, 3]</sup>. A recent UK surveillance study estimated that the annual number of people aged 17–19 years with an ongoing need for ADHD medication lies between 270 and 599 per 100,000, with an even higher number requiring non-pharmacological support for their ADHD,<sup>[4]</sup>. Higher ADHD prevalence is associated with financial difficulties and economic disadvantage, resulting in higher service needs in some areas,<sup>[5]</sup>. The social and financial challenges of Covid-19 are likely to have intensified support needs, while also introducing new barriers to accessing health services. Treatment has been shown to reduce the risk of experiencing poorer outcomes in young people with ADHD,<sup>[1, 3]</sup>. Withdrawal of treatment in young people can have particularly profound effects, as this is a vulnerable life stage, when multiple simultaneous transitions are occurring,<sup>[6]</sup>.

### ADHD service provision

For young people with ADHD who require ongoing support into adulthood, UK National Institute for Health and Care Excellence (NICE) guidance recommends a smooth transition into adult services, with the prescribing and monitoring of ADHD medication carried out under shared care protocol arrangements between primary and secondary care services,<sup>[7]</sup>. However, the Children and Adolescents with ADHD in Transition between Children's and Adult Services (CATCh-uS) study estimated that less than a quarter of young people who needed ADHD medication made the transition to adult mental health services,<sup>[4]</sup>. This is likely to be due to a combination of factors, including the availability and accessibility of adult ADHD services, which vary widely, and a lack of information on, and preparation for, transition,<sup>[4, 8-12]</sup>. Even where medication is continued, management of ADHD may be sub-optimal without access to specialist assessment of ADHD, advice on titration, or non-pharmacological support,<sup>[13]</sup>.

The variation in services and support for young people (aged 16-25 years) with ADHD creates inequities in access and increases pressure on primary care,<sup>[8-10]</sup>. As a result, general practitioners (GPs) may end up providing care for young people with ADHD 'by default' due to long waiting times, a lack of adult services, or because a person does not meet service eligibility criteria,<sup>[10-12]</sup>; with some GPs reporting concerns about safety, risk and responsibility and workload,<sup>[10]</sup>. Variations in prescribing protocols and classification of ADHD drugs in local formularies,<sup>[10]</sup> means some young people may also have difficulties registering with a GP willing to prescribe. Young people with ADHD have expressed a lack of confidence in primary care to help them manage their condition, and report frustration with the information provided by GPs and the support available,<sup>[11, 12, 14, 15]</sup>.

### Primary care

Debates over how to tackle a 'failure of healthcare' for ADHD, especially at transition, often include an expanded role for primary care through recently established primary care networks (PCNs) of GP practices,<sup>[6, 16]</sup>. NICE recommend further studies about the role of primary care in supporting young people discharged from children's services,<sup>[17]</sup>. Challenges around shared care and guidance

1  
2  
3  
4  
5  
6 implementation have been recognised by working groups established by the UK Adult ADHD Network  
7 (UKAAN), and NHS England,[6]. There is currently no overview or map of the different models of care  
8 and roles that exist in primary care to support people with ADHD, though our own and others'  
9 qualitative research has highlighted variations in prescribing practice and shared care models,[16].  
10 NHS England's mandate to strengthen primary care and reduce inequalities, needs to be met through  
11 consulting with patients and the public, and using the patient pathway approach,[18]. However, the  
12 current lack of national level data mapping pathways in primary care for young people with ADHD, is  
13 hindering efforts to optimise outcomes for this underserved group.  
14  
15

## 16 **Co-production**

17  
18 Co-production which can be defined as ways of working that involve people using health services,  
19 carers, practitioners, and the wider community, is increasingly seen as critical for research aiming to  
20 strengthen health and care systems,[19, 20]. This rapidly evolving methodology within health and  
21 social care research, which is advocated and supported by the National Institute for Health and Care  
22 Research (NIHR [19], is characterised by key principles of:  
23

- 24 • the sharing of power (so that research is jointly owned by those involved),
- 25 • including all perspectives and skills (so that all those who can contribute are included), and
- 26 • respecting and valuing the knowledge of all those working together (with equal importance).  
27  
28

29  
30 The Five Year Forward View for Mental Health,[21] called for development of evidence-based  
31 approaches to co-production in commissioning. The NHS Long Term Plan,[22] also emphasises the  
32 importance of working collaboratively to find solutions to address unmet health and social care  
33 needs. Therefore, research aiming to provide evidence to tackle identified 'failures' in NHS healthcare  
34 provision for young people with ADHD needs to involve stakeholders who can contribute varied  
35 knowledge and experience throughout the research process.  
36

## 37 **RATIONALE**

38  
39 This research has been developed in response to identified gaps in the literature and existing services  
40 (as outlined above), and priorities highlighted by people with ADHD. The research team includes  
41 young people with ADHD whose input will help ensure the research is sensitive and relevant, an  
42 academic GP to ensure identified solutions are deliverable within primary care settings. Also, our  
43 research advisory groups (RAGs), made up of healthcare practitioners and young people with ADHD  
44 and their supporters.  
45

46  
47 Under the NHS Long Term plan,[22] and NHS Mental Health Implementation plan,[23] the recent  
48 formation of PCNs in combination with the establishment of NHS integrated care systems (ICSs)  
49 (partnerships of organisations that come together to plan and deliver joined up health and care  
50 services), represents an opportunity to establish new and effective working practices to enable  
51 consistent and accessible healthcare for all young people with ADHD. The NHS Community Mental  
52 Health Framework,[24] also sets out a vision for how community services should modernise to offer  
53 joined-up-care for those with mental health needs, within ICSs. Recent guidance, stemming from  
54 professionals across primary, secondary, and tertiary care in the UK, has recommended the  
55 development of an ADHD specialism within primary care, as part of a roadmap for improving access to  
56 treatment [25]. The evidence base outlined above, and current guidelines,[7] highlight the key role  
57 primary care services have to play in the provision of healthcare for young people with ADHD, and the  
58 potential for supporting an expansion of this role. Not only are primary care practitioners, such as  
59 GPs, often the gatekeepers through the referral system to secondary care services, such as adult  
60

1  
2  
3  
4  
5  
6 mental health and specialist ADHD services, but NICE guidelines recommend that they also provide  
7 healthcare support such as routine monitoring, and prescribing of medication under shared care  
8 agreements with secondary care services,[7].  
9

10 Furthermore, primary care services have an increasing role to play in terms of providing mental health  
11 and wellbeing support to young people with ADHD, with additional roles such as mental health  
12 workers and social prescribing link workers funded through PCNs,[26]. However, the challenges for  
13 primary care in delivering co-ordinated and accessible healthcare for young people with ADHD, need  
14 to be better understood.  
15

16 Currently, little is known about whether or how services are provided for young people aged 16-25  
17 with ADHD in primary care in England, or about areas of good practice, and optimal models and  
18 pathways for improving access to healthcare for this underserved group. While the NHS Long Term  
19 Plan,[22] aims to dissolve the historic divide between primary and secondary/specialist care,  
20 delivering healthcare across systems remains challenging. For example, existing evidence indicates  
21 that GPs can feel unsupported and uncertain about providing medication under shared care  
22 agreements,[10, 27].  
23  
24

25 In line with current need, the aim of this research is therefore to map current services and provide an  
26 evidence-base to inform co-produced guidance to improve primary care for young people aged 16-25  
27 years with ADHD. The objectives are to:  
28

- 29 1. Develop a map and overview of current primary care pathways and prescribing practice in the  
30 management of young people with ADHD in England
- 31 2. Explore:  
32
  - 33 ○ Primary care providers and related organisations' needs for prescribing support in their  
34 roles managing care for young people with ADHD
  - 35 ○ The expectations and needs of young people regarding ADHD support, information,  
36 and management in primary care
- 37 3. Co-produce evidence informed guidance to better co-ordinate primary care and improve  
38 accessibility for young people with ADHD, based on discussions around integrated findings  
39 from objectives 1 and 2  
40  
41  
42  
43

## 44 **METHODS AND ANALYSIS**

### 45 **Overview**

46 This mixed-methods study consists of three work packages to address the three objectives outlined  
47 above: a survey, qualitative interviews, and integration of findings to support co-production of  
48 guidance. Participants in each will include people aged 16 or over with lived experience of ADHD (and  
49 their supporters), health professionals with a focus on primary care (such as GPs, nurses, mental  
50 health practitioners, and clinical pharmacists), and primary care commissioners/providers. Sampling,  
51 recruitment strategies, and eligibility criteria, vary slightly between work packages. For details of  
52 eligibility criteria by work package (WP), see figure 1.  
53  
54  
55  
56  
57

58 >>Insert figure 1 here<<  
59  
60

1  
2  
3  
4  
5  
6 The research will be guided and informed throughout by six-monthly meetings with two research  
7 advisory groups (RAGs) made up of a diverse mix of primary healthcare practitioners, and young  
8 people with ADHD and their parents/carers. These will be a practice and policy research advisory  
9 group (P-RAG), and a young person and parent/carer research advisory group (Y-RAG).  
10

11 Named research partners will support delivery of the research, including advising on delivery of the  
12 research and dissemination of results. These include the ADHD Foundation, the UK Adult ADHD  
13 Network (UKAAN), NIHR Clinical Research Network South West Peninsula, and Devon Partnership NHS  
14 Trust (DPT).  
15

## 16 **Work package one (WP1) Survey**

### 17 Design

18  
19 A mapping study will involve an online survey of primary care provision for young people and adults  
20 with ADHD in England. Informants will be sampled from three key stakeholder groups - service users,  
21 healthcare professionals, and commissioners/providers - via a mixture of convenience and purposive  
22 techniques. Due to the sampling methods, self-selection bias is likely, which is acknowledged within  
23 the study design and will be clearly discussed as a limitation in the write up of findings. Despite this  
24 limitation this sample is still expected to provide valuable data. The target sample size will be a  
25 minimum of 252 participants in total (providing a minimum of six responses for each ICS in England).  
26 The survey will be open for up to 16 weeks. Responses will be reviewed part-way through this period,  
27 with subsequent survey promotion and reminders targeted to achieve a balanced mix of responses by  
28 geographic location and stakeholder group. The survey will use the seven-step pragmatic health  
29 service mapping method, developed through extensive patient and public involvement,[28], and  
30 previously used to map adult mental health service availability for adults with ADHD in England in  
31 2018,[9].  
32  
33  
34  
35

### 36 Participants

37  
38 Participants located across England will be invited to participate via direct email, social media, partner  
39 organisation mailing lists, and organisation newsletters and websites. For eligibility criteria, see figure  
40 1.  
41

### 42 Data collection

43  
44 Data will be collected online via a certified GDPR compliant online survey tool; Qualtrics® (Provo, UT,  
45 USA. <https://www.qualtrics.com>). The survey will include demographic questions about the  
46 respondent's role, location, and any practice/organisation they are linked to, and core research  
47 questions (see figure 2) exploring current primary care practice in relation to the NICE [7] guidelines  
48 for diagnosis and management of ADHD. The survey will be designed (and programmed) so that  
49 respondents will be taken to different questions, depending on the stakeholder group that they  
50 primarily identify with. Final survey wording will be piloted and agreed in consultation with study  
51 RAGs.  
52  
53  
54

55 >>Insert figure 2 here<<  
56  
57  
58  
59  
60

## Analysis

Data will be analysed using Stata® SE15 (StataCorp LP, College Station, TX, USA). Descriptive statistics will be used to summarise respondent characteristics by geographic location and stakeholder group. A full data analysis and presentation plan will be developed and informed by discussions with study RAGs. Variation by stakeholder group and local area characteristics (e.g., rural/urban, ethnic mix, socio-economic status) will be summarised and tabulated by geographic unit. The unit size (e.g., PCN, ICS, NHS Region) used in each analysis will be dependent on the volume of available data, and whether an analysis at the stated level will provide meaningful information, following consultation with stakeholder groups. Where appropriate, data will be presented on a map of England using a geographic information system (QGIS 3.24), illustrating variation by region or other geographic unit on prescribing practice, shared care, specialist support etc. Accessible visual tools, such as Google® My Map, will be used to communicate findings with stakeholders.

## Work package two (WP2) Qualitative

### Design

A qualitative study consisting of semi-structured interviews (or focus-groups) with a sample of 10-15 young people with ADHD and their supporters, and 10-15 primary care professionals/commissioners from a range of geographic locations in England. Interviews with professionals/commissioners are combined, due to resource limitations. Decisions on final sample makeup, and the structure of interviews vs focus groups will be made following WP1, and in consultation with the study RAGs. The number of locations (between three and six) and boundaries (e.g., GP surgery, PCN, or ICS) will be decided based on findings from WP1. Locations will be purposively chosen (informed by findings from WP1) to reflect a variety of local approaches to primary care practice for treatment and support of ADHD. These might for example include a GP surgery serving university students, or an urban surgery with a GP who has a special interest in mental health.

### Participants

Participants will be purposely sampled to include of a diverse mix of young people with ADHD and their parent/carers, health professionals, and commissioners/providers of NHS services for ADHD. For eligibility criteria, see figure 1.

### Data collection

Data will be collected using semi-structured interviews/focus-groups that follow topic guides developed and refined in consultation with the RAGs (see supplementary files 1 and 2). Topic guides will be iteratively adjusted and will contain similar prompts for interviews and focus groups. For health professionals, these will cover perspectives on their role in managing young people with ADHD, needs for support with prescribing and other aspects of management, the information they need in terms of format, content and timing, their awareness of existing information resources and their preferences regarding access to and use of information in their role. For young people, these will cover perspectives on their experiences of support from primary care, their expectations from primary care consultations and the information and signposting needed to access care. Topic guides will also cover the following content:

- Background on participant's current ADHD/healthcare context
- Experiences of
  - Care and support for ADHD through primary care



- Support for wider mental and physical health need of people with ADHD through primary care
  - Adjustments to help people with ADHD access primary care
  - Experiences of primary care consultations
  - Information and resources that might improve provision and accessibility of healthcare for young people with ADHD through primary care

Interviews/focus-groups will be conducted using a variety of mediums (e.g., online meetings, by telephone, or face-to-face), depending on the needs and preferences of participants. This flexible approach draws on evidence that respondents' experience of control and choice affects take up of studies [29]. It is also designed to accommodate the communication preferences and needs of young people with ADHD and their supporters and takes account of the limited availability of healthcare professionals, thus maximising the inclusivity of the research. Where individual interviews are not feasible due to resource or time constraints (for example from a busy primary care team), focus-groups will be conducted to collect data. Focus groups may also generate richer data in some circumstances, for example when discussing care pathways potentially involving multiple roles.

#### Analysis

Data from WP2 will be managed in NVivo (QSR International, Warrington, UK), and analysed using reflexive thematic analysis (RTA),[30, 31]. A codebook approach will be used to structure findings and provide insights suitable for applied policy research,[30, 32, 33]. The research process will be informed by an acknowledgement of the researcher's active role in knowledge production, and a recognition of the interpretive nature of data coding,[30]. The framework method,[33-35], will be used to generate themes reflexively through a process of inductive and deductive analyses, and a combination of semantic and latent coding,[36]. The analysis will be underpinned by a critical realist perspective. This reflexive theoretical stance will highlight the context of the data, and the influence of researcher and stakeholder perspectives, providing a nuanced interpretation of meaning suitable to inform the co-production of guidance (in WP3).

An understanding of the need for information resources and prescribing and healthcare support will be developed within a range of different geographical and socio-economic contexts, and different models of care.

#### **Work package three (WP3) Co-production**

##### Design

Co-production methods consisting of a series of consultations, will be conducted in line with national standards for public involvement,[37] and following national guidance on co-producing a research project,[19]. The outline design for WP3 will be refined through consultation with the RAGs, research partners, and shaped following integration of findings from WP1 and WP2 into emerging themes and priority areas. A flexible research design, informed by previously documented co-production methods,[38] will enable participants to co-produce guidance using available evidence, to improve primary care for young people with ADHD.

##### Participants

There will be between six and 16 participants, reflecting a diversity of roles and experience including young people with ADHD (and their parents/carers), health professionals, and members of the

1  
2  
3  
4  
5  
6  
7  
8  
9  
10  
11  
12  
13  
14  
15  
16  
17  
18  
19  
20  
21  
22  
23  
24  
25  
26  
27  
28  
29  
30  
31  
32  
33  
34  
35  
36  
37  
38  
39  
40  
41  
42  
43  
44  
45  
46  
47  
48  
49  
50  
51  
52  
53  
54  
55  
56  
57  
58  
59  
60

research team. The number of participants will be kept small to enable flexible and interactive debate between participants. Participants will be recruited from study RAGs, WP1 and WP2, with the final recruitment strategy designed and agreed in consultation with study RAGs. For eligibility criteria, see figure 1.

#### Data collection

Data will be collected by means of between two and four workshops that build iteratively on each other; with additional discussion facilitated through meetings and emails. Workshops and meetings will be conducted using variety of mediums (e.g., online meetings, or face-to-face), depending on the needs and preferences of participants. WP3 will bring stakeholders together, providing space and time to consider and integrate evidence from WP1 and WP2, and to engage in discussions, refinement of ideas, and prioritisation setting exercises. The aim will be to produce accessible outputs designed for communication with a variety of audiences (e.g., health professionals, service users and service commissioners/providers). Possible outputs include:

- A map of patient pathways for young people accessing ADHD treatment and support through primary care,
- A geographic overview of primary care provision, including areas of good practice and gaps in accessible care
- Templates for information resources for primary care practitioners and young people, including a plan for further implementation
- Key messages for primary care practitioners and young people (e.g., what information do practitioners need to prescribe and titrate, what questions do young people want answers to?)
- Suggestions for innovative technology-supported solutions to assist healthcare providers and young people with addressing the challenges encountered when care spans primary and secondary care systems

Throughout WP3, the research team will maintain written records that chronicle and record information about the research process. Researchers will keep reflective diaries, recording tensions, sticking points and what is working well.

#### Analysis

WP3 will involve design followed by trialling and iterative refinement of integrated findings and co-produced outputs. A record will be kept of participant feedback on outputs. Co-produced guidance will be checked by research team members who have not been directly involved in the analysis, and with members of the RAGs, who will be asked to provide feedback on the output to verify its validity and consult on suitable methods of dissemination. Participant approved final versions of guidance and information will be disseminated as part of MAP study findings, using a variety of formats.

#### Outcomes

The outcomes of this research will be shaped by close work with professionals and members of the community to ensure their relevance and utility. Anticipated outcomes include:

- Overview of primary care provision for young people with ADHD across England, including:



- Geographic map, showing variation in provision by NHS region or appropriate organisational boundaries
- Qualitative findings reflecting the perspectives of people involved in providing and in need of care, on the management of ADHD in primary care including:
  - Health professionals' needs for prescribing support
  - Young people with ADHD and their parent/carers' needs for healthcare and support with self-management
- Co-produced guidance on how to better design and co-ordinate primary care for young people aged 16-25 years with ADHD

Research outcomes will be communicated to a range of academic, clinical, and lay audiences via a range of mediums including peer reviewed academic publications, lay summaries, presentations at academic and organisational conferences, and via the study website.

### **Patient and Public Involvement**

This proposal stemmed from requests made by participants in previous research [39] for information about GPs who prescribe for ADHD. Meetings between members of the research team and young people with ADHD, including AS who is an expert by experience and part of the research team, helped shaped the study design.

Patient and public involvement in this research will be conducted in accordance with the NIHR National Standards for Public Involvement,[20]. It will follow a framework for involvement to include respect, support, transparency, responsiveness, fairness of opportunity, and accountability. People and the community will be involved in all stages of this research.

Involvement and engagement of all stakeholders will be built into the culture of this research study and embedded in research processes through the following study structures:

- Core research group: inclusion of a young person with ADHD and an academic GP
- Research advisory groups (RAGs) meeting regularly to shape research progress:
  - Y-RAG, made up of young people with ADHD and their parent/carers
  - P-RAG made up of practitioners and service commissioners/providers
- Research partnerships: with service user and practitioners' organisations such the UK ADHD Foundation and Devon Partnership Trust (DPT)
- Research design: use of co-production methodology in WP3 to jointly generate guidance and outputs

### **Data statement**

A technical appendix and dataset will be available from the lead author on request. Data will be stored in accordance with Exeter University's data storage policies. If agreed with the research team, qualitative data (from WP2 and WP3) will be deposited with the UK Data Service, for long-term preservation.

### **ETHICS AND DISSEMINATION**

1  
2  
3  
4  
5  
6 The protocol has been approved by the Yorkshire and the Humber – Bradford Leeds Research Ethics  
7 Committee (REC Reference: IRAS 313424). The study will be carried out in accordance with the  
8 Declaration of Helsinki (Fortaleza, Brazil, October 2013), the UK Policy Framework for Health and  
9 Social Care Research (2020) and the general principles of Good Clinical Practice E6 (R2). The study has  
10 been adopted by the National Institute for Health Research (NIHR) Clinical Research Network and has  
11 relevant local NHS research approvals. The trial is sponsored by the University of Exeter.  
12

13 This research aims to answer a research question that is relevant and of importance to young people  
14 with ADHD, a currently underserved population in the UK. It is supported and informed by research  
15 advisors and partner organisations who represent the views and experiences of people with lived  
16 experience of ADHD, health professionals, and commissioners/providers. The collaborative research  
17 design will help to ensure that the research is conducted in a sensitive manner and will result in  
18 outputs that are appropriately communicated and useful.  
19  
20

#### 21 Amendments

22  
23 Sponsor SOPs are being followed for amendments. Please note, it is anticipated that versions of study  
24 documents (e.g., Consent forms) may be updated following planned stakeholder engagement  
25 activities. Where documents are amended, HRA guidance on amending an approval will be followed,  
26 and advice and approval of the study sponsor will be sought on whether changes qualify as non-  
27 substantial or substantial amendments. In all cases, HRA processes will be followed, with documents  
28 updated in IRAS (using version control) and communicated to the REC (as appropriate).  
29  
30  
31  
32  
33  
34  
35  
36  
37  
38  
39  
40  
41  
42  
43  
44  
45  
46  
47  
48  
49  
50  
51  
52  
53  
54  
55  
56  
57  
58  
59  
60

## FUNDING

This project is funded by an NIHR Three School's Mental Health Research Fellowship (MHF008). AP and research project activities are funded by this fellowship. The grant is administered by the NIHR School for Primary Care Research. The study sponsor has seen, approved, and signed off the protocol. This project is supported by the NIHR Clinical Research Network South West Peninsula.

AP holds a Fellowship (award number MH008) funded by the Three NIHR Research Schools Mental Health Programme. FM is funded by a NIHR Doctoral Fellowship (NIHR300957) and is an affiliate of the NIHR Greater Manchester Patient Safety Translational Research Centre. This work was supported by the NIHR Greater Manchester Patient Safety Translational Research Centre (award number: PSTRC-2016-003). TND is funded by an NIHR Advanced Fellowship (NIHR300056). The views expressed are those of the author(s) and not necessarily those of the NIHR or the Department of Health and Social Care.

## Author declarations of competing interests

Dr Price, Dr Smith, Dr Mughal, Dr Salimi, Dr Melendez-Torres, and Dr Tamsin Newlove-Delgado have nothing to disclose.

## Contributor-ship statement

The research idea was inspired by and developed with people with ADHD and their supporters. The original research design stemmed from development work conducted by AP and TND. All authors actively contributed to the research design. AP, TND, and JS developed the protocol. AP leads the study, drafted the protocol ready for publication, and wrote the ethics submission. TND, JS, and GJMT provide research oversight and academic mentorship. FM is an academic GP and leads on healthcare professional representation and provides primary care expertise. AS leads on patient and public involvement (PPI) representation. All authors commented on the protocol and the manuscript, provided final approval for publication, and agree to be accountable for all aspects of the work in ensuring that questions related to the accuracy or integrity of any part of the work are appropriately investigated and resolved.

## Acknowledgements

We would like to thank all those who have contributed to this study, including the healthcare professionals, and people with ADHD and their supporters who have been involved in the conception and planning of this research. Also, the colleagues, collaborators, and research partners that have supported every aspect of this study.

## Exclusive Licence

I, the Submitting Author has the right to grant and does grant on behalf of all authors of the Work (as defined in the below author licence), an exclusive licence and/or a non-exclusive licence for contributions from authors who are: i) UK Crown employees; ii) where BMJ has agreed a CC-BY licence shall apply, and/or iii) in accordance with the terms applicable for US Federal Government officers or employees acting as part of their official duties; on a worldwide, perpetual, irrevocable, royalty-free basis to BMJ Publishing Group Ltd ("BMJ") its licensees and where the relevant Journal is co-owned by BMJ to the co-owners of the Journal, to publish the Work in BMJ Open and any other BMJ products and to exploit all rights, as set out in our licence.

1  
2  
3  
4  
5  
6 The Submitting Author accepts and understands that any supply made under these terms is made by  
7 BMJ to the Submitting Author unless you are acting as an employee on behalf of your employer or a  
8 postgraduate student of an affiliated institution which is paying any applicable article publishing  
9 charge (“APC”) for Open Access articles. Where the Submitting Author wishes to make the Work  
10 available on an Open Access basis (and intends to pay the relevant APC), the terms of reuse of such  
11 Open Access shall be governed by a Creative Commons licence – details of these licences and  
12 which Creative Commons licence will apply to this Work are set out in our licence referred to above.  
13  
14

### 15 **Figure legends**

16  
17 Figure 1. Participant eligibility criteria, by work package.

18  
19 Figure 2. Work package 1 (survey), core research questions.  
20  
21  
22  
23  
24  
25  
26  
27  
28  
29  
30  
31  
32  
33  
34  
35  
36  
37  
38  
39  
40  
41  
42  
43  
44  
45  
46  
47  
48  
49  
50  
51  
52  
53  
54  
55  
56  
57  
58  
59  
60

## REFERENCES

1. Sayal, K., et al., *Pathways to care in children at risk of attention-deficit hyperactivity disorder*. Br J Psychiatry, 2002. **181**(01): p. 43-8.
2. Faraone, S.V., J. Biederman, and E. Mick, *The age-dependent decline of attention deficit hyperactivity disorder: a meta-analysis of follow-up studies*. Psychol Med, 2006. **36**(2): p. 159-65.
3. Shaw, M., et al., *A systematic review and analysis of long-term outcomes in attention deficit hyperactivity disorder: effects of treatment and non-treatment*. BMC Med, 2012. **10**(1): p. 99.
4. Eke, H., et al., *Transition between child and adult services for young people with attention-deficit hyperactivity disorder (ADHD): findings from a British national surveillance study*. Br J Psychiatry, 2020. **217**(5): p. 616-622.
5. Prasad, V., et al., *Attention-deficit/hyperactivity disorder: variation by socioeconomic deprivation*. Arch Dis Child, 2019. **104**(8): p. 802-805.
6. Young, S., et al., *Recommendations for the transition of patients with ADHD from child to adult healthcare services: a consensus statement from the UK adult ADHD network*. BMC Psychiatry, 2016. **16**: p. 301.
7. NICE. *Attention deficit hyperactivity disorder: diagnosis and management (NG87)*. 2018 [cited 2019 29th March]; Available from: <https://www.nice.org.uk/guidance/ng87/chapter/Recommendations>.
8. Hall, C.L., et al., *Services for young people with attention deficit/hyperactivity disorder transitioning from child to adult mental health services: a national survey of mental health trusts in England*. J Psychopharmacol, 2015. **29**(1): p. 39-42.
9. Price, A., et al., *Mapping UK mental health services for adults with attention-deficit/hyperactivity disorder: national survey with comparison of reporting between three stakeholder groups*. BJPsych Open, 2020. **6**(4): p. e76.
10. Newlove-Delgado, T., et al., *Young people with attention deficit hyperactivity disorder in transition from child to adult services: a qualitative study of the experiences of general practitioners in the UK*. BMC Fam Pract, 2019. **20**(1): p. 159.
11. Matheson, L., et al., *Adult ADHD patient experiences of impairment, service provision and clinical management in England: a qualitative study*. BMC Health Serv Res, 2013. **13**: p. 184.
12. Newlove-Delgado, T., et al., *'You're 18 now, goodbye': the experiences of young people with attention deficit hyperactivity disorder of the transition from child to adult services*. Emotional and Behavioural Difficulties, 2018. **23**(3): p. 296-309.
13. Coghill, D.R., *Organisation of services for managing ADHD*. Epidemiol Psychiatr Sci, 2017. **26**(5): p. 453-458.
14. French, B., K. Sayal, and D. Daley, *Barriers and facilitators to understanding of ADHD in primary care: a mixed-method systematic review*. Eur Child Adolesc Psychiatry, 2019. **28**(8): p. 1037-1064.
15. Price, A., et al., *In transition with ADHD: the role of information, in facilitating or impeding young people's transition into adult services*. BMC psychiatry, 2019. **19**(1): p. 404.
16. Young, S., et al., *Failure of Healthcare Provision for Attention-Deficit/Hyperactivity Disorder in the United Kingdom: A Consensus Statement*. Front Psychiatry, 2021. **12**: p. 649399.
17. NICE. *Transition from children's to adults' services for young people using health or social care services (NG43)*. 2016 [cited 2019 3rd April]; Available from: <https://www.nice.org.uk/guidance/ng43>.
18. NHS England. *General practice forward view*. 2016 [cited 2021 3rd October]; Available from: <https://www.england.nhs.uk/publication/general-practice-forward-view-gpfv/>.
19. NIHR. *Guidance on co-producing a research project*. 2021 [cited 2022 8th March]; Available from: <https://www.learningforinvolvement.org.uk/?opportunity=nihr-guidance-on-co-producing-a-research-project>.
20. NIHR. *UK Standards for Public Involvement*. 2019 [cited 2022 8th March]; Available from: <https://sites.google.com/nihr.ac.uk/pi-standards/standards>.
21. NHS England. *Five year forward view*. 2014 [cited 2019 29th March]; Available from: <https://www.england.nhs.uk/publication/nhs-five-year-forward-view/>.
22. NHS England. *The NHS long term plan*. 2019 [cited 2022 26th February]; Available from: <https://www.longtermplan.nhs.uk/publication/nhs-long-term-plan/>.

- 1  
2  
3  
4  
5  
6  
7  
8  
9  
10  
11  
12  
13  
14  
15  
16  
17  
18  
19  
20  
21  
22  
23  
24  
25  
26  
27  
28  
29  
30  
31  
32  
33  
34  
35  
36  
37  
38  
39  
40  
41  
42  
43  
44  
45  
46  
47  
48  
49  
50  
51  
52  
53  
54  
55  
56  
57  
58  
59  
60
23. NHS England. *NHS mental health implementation plan*. 2019 [cited 2022 26th February]; Available from: <https://www.longtermplan.nhs.uk/publication/nhs-mental-health-implementation-plan-2019-20-2023-24/>.
  24. NHS England. *The Community Mental Health Framework for Adults and Older Adults*. 2019 [cited 2022 26th February]; Available from: <https://www.england.nhs.uk/mental-health/adults/cmhs/>.
  25. Asherson, P., et al., *Mainstreaming adult ADHD into primary care in the UK: guidance, practice, and best practice recommendations*. BMC Psychiatry, 2022. **22**(1): p. 640.
  26. Naylor, C., et al., *Mental health and primary care networks: understanding the opportunities*. The King's Fund, 2020.
  27. Carrington, I.M. and J. McAloon, *Why shared-care arrangements for prescribing in attention deficit hyperactivity disorder may not be accepted*. Eur J Hosp Pharm, 2018. **25**(4): p. 222-224.
  28. Price, A., et al., *Seven steps to mapping health service provision: lessons learned from mapping services for adults with Attention-Deficit/Hyperactivity Disorder (ADHD) in the UK*. BMC Health Serv Res, 2019. **19**(1): p. 468.
  29. Catania, J.A., et al., *Effects of interviewer gender, interviewer choice, and item wording on responses to questions concerning sexual behavior*. Public Opinion Quarterly, 1996. **60**(3): p. 345-375.
  30. Braun, V. and V. Clarke, *Reflecting on reflexive thematic analysis*. Qual Res Sport Exerc Health, 2019. **11**(4): p. 589-597.
  31. Braun, V. and V. Clarke, *Using thematic analysis in psychology*. Qualitative research in psychology, 2006. **3**(2): p. 77-101.
  32. Smith, J. and J. Firth, *Qualitative data analysis: the framework approach*. Nurse researcher, 2011. **18**(2): p. 52-62.
  33. Ritchie, J., J. Lewis, and G. Elam, *Designing and selecting samples*. 2003: London: Sage.
  34. Gale, N.K., et al., *Using the framework method for the analysis of qualitative data in multi-disciplinary health research*. BMC Med Res Methodol, 2013. **13**: p. 117.
  35. Ritchie, J. and L. Spencer, *Qualitative data analysis for applied policy research*, in *Analyzing Qualitative Data*, A. Bryman and R. Burgess, Editors. 1994, Routledge: New York.
  36. Byrne, D., *A worked example of Braun and Clarke's approach to reflexive thematic analysis*. Quality & Quantity, 2021.
  37. HRA. *HRA Approval in Primary Care Settings – Principles of Study Set-Up*. 2017 [cited 2022 8th March]; Available from: <https://www.hra.nhs.uk/planning-and-improving-research/best-practice/nhs-site-set-up-in-england/>.
  38. Evans, B.A., et al., *A co-produced method to involve service users in research: the SUCCESS model*. BMC Medical Research Methodology, 2019. **19**(1): p. 34.
  39. Janssens, A., et al. *The transition from children's services to adult services for young people with attention deficit hyperactivity disorder: the CATCh-uS mixed-methods study*. 2020; Available from: <https://www.journalslibrary.nihr.ac.uk/hsdr/hsdr08420#/abstract>.



| Work package (WP)             | Inclusion criteria                                                                                                                                                                                                                                                                                                                                                                                                                                                                                                                                                                                                                                                                                              | Exclusion criteria                                                                                                                                                                                                                                                                                                                                                                                                               |
|-------------------------------|-----------------------------------------------------------------------------------------------------------------------------------------------------------------------------------------------------------------------------------------------------------------------------------------------------------------------------------------------------------------------------------------------------------------------------------------------------------------------------------------------------------------------------------------------------------------------------------------------------------------------------------------------------------------------------------------------------------------|----------------------------------------------------------------------------------------------------------------------------------------------------------------------------------------------------------------------------------------------------------------------------------------------------------------------------------------------------------------------------------------------------------------------------------|
| WP 1 (survey)                 | Identifies as one (or more) of the following: <ul style="list-style-type: none"> <li>• A person (aged 16 or over) with lived experience of ADHD, or</li> <li>• A supporter of a person with ADHD, or</li> <li>• A primary care health professional, or</li> <li>• A commissioner/provider of NHS primary care services</li> </ul> And <ul style="list-style-type: none"> <li>• Currently resident, working, or studying in England</li> </ul>                                                                                                                                                                                                                                                                   | <ul style="list-style-type: none"> <li>• Does not identify as a person aged 16 or over with ADHD, a supporter, a primary care health professional, or a commissioner/provider of NHS primary care services</li> <li>• Not currently resident, working, or studying in England</li> </ul>                                                                                                                                         |
| WP 2 (qualitative study)      | One (or more) of the following: <ul style="list-style-type: none"> <li>• A young person (aged 16-25) with ADHD, or</li> <li>• A supporter of a young person with ADHD, or</li> <li>• A primary care health professional, or</li> <li>• A commissioner/provider of NHS primary care services</li> </ul> And <ul style="list-style-type: none"> <li>• Currently resident or working in England</li> </ul> And <ul style="list-style-type: none"> <li>• Currently resident or working within the geographic locality of one of the qualitative study sites (sites to be decided based on findings from WP1)</li> </ul>                                                                                             | <ul style="list-style-type: none"> <li>• Not a young person with ADHD, a supporter, a primary care health professional, or a commissioner/provider of NHS primary care services</li> <li>• Not currently resident, working, or studying in England</li> <li>• Not currently resident, or working within the geographic locality of one of the qualitative study sites</li> </ul>                                                 |
| WP 3 (co-production research) | One (or more) of the following: <ul style="list-style-type: none"> <li>• A young person with lived experience of ADHD, or</li> <li>• A supporter of a young person with ADHD, or</li> <li>• A primary care health professional, or</li> <li>• A commissioner/provider of NHS primary care services</li> <li>• A member of the MAP study research team</li> </ul> And <ul style="list-style-type: none"> <li>• Currently resident or working in England</li> </ul> And <ul style="list-style-type: none"> <li>• Willing and able to work collaboratively and engage in consultations to co-produce evidence-based guidance for improving the co-ordination of primary care for young people with ADHD</li> </ul> | <ul style="list-style-type: none"> <li>• Not a young person with ADHD, a supporter, a primary care health professional, a commissioner/provider of NHS primary care services, or a member of the MAP study research team</li> <li>• Not currently resident, working, or studying in England</li> <li>• Not willing and able to work collaboratively and engage in consultations to co-produce evidence-based guidance</li> </ul> |

ADHD = Attention deficit hyperactivity disorder

MAP study = Managing young people with ADHD in primary care (MAP) study

Figure 1. Participant eligibility criteria, by work package.

213x279mm (72 x 72 DPI)



**Work package 1 (survey)****Core research questions:**

- Are adult ADHD medications prescribed via local primary care providers?
- Is a Shared Care Protocol in place to enable prescribing of adult ADHD medication locally through primary care?
- Is there an Adult Mental Health Service available to provide advice and support to local primary care providers in providing treatment and support for adult ADHD?
- Do local primary care providers:
  - Provide transitional support for young people with ADHD as they navigate the boundary between child and adult services?
  - Provide non-pharmacological support for young people with ADHD (such as mental health support, signposting, and provision of psychological interventions focused on ADHD)?
- What are the preferred methods for accessing information about treatment and support for young people with ADHD?
- What awareness is there of any additional or raised health risks associated with having ADHD?

Figure 2. Work package 1 (survey), core research questions.

196x138mm (72 x 72 DPI)

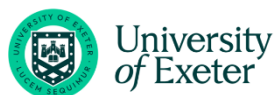

## Interview Topic Guide - WP2 (Health professionals and providers)

**Study title:** Managing young people with ADHD in primary care (MAP) study

**Chief Investigator:** Dr Anna Price [a.price@exeter.ac.uk](mailto:a.price@exeter.ac.uk). Telephone 01392 726026

*Please note this topic guide is for researchers only. This will be used to prompt questions during the interview. This is not a questionnaire. This topic guide will be adapted and refined following findings from WP1, and in consultation with MAP study research advisory groups.*

This interview aims to explore your experiences in relation to providing services and support for young people with ADHD in primary care (e.g., GP practice or local surgery). There will be a particular focus on factors that have made it easier and those that have made it harder to provide accessible and appropriate care. Also, on any recommendations you may have to improve access to primary care for young people with ADHD in the future.

### Demographics

1. **What is your primary role?** (e.g., GP, specialist nurse, PCN manager, pharmacist)
2. **What other roles also describe you?** (e.g., also have ADHD or also mental health lead for practice)
3. **How long have you been in your current role?**
4. **What is your geographic location?** (e.g., postcode of your workplace, or local GP practice)

### Research topic guides

#### 1. Current healthcare context

- a. What are your experiences of providing healthcare for young people and adults with ADHD? (Prompts: cover GP, specialist services, CAMHS, AMHS, psychological therapies)
- b. What other interests or experiences do you have that could relate to providing healthcare and support for people with neurodiverse conditions (e.g., ADHD, Autism) and/or mental health needs? (e.g., special interest, training, personal experience)
  - i. Do you have experience of providing transition support for young people with long term conditions?

#### 2. Providing care and support for ADHD through primary care

- a. Please tell us about your experiences of providing (or trying to provide) care for ADHD via your local primary care practice/network. (Prompts: prescriptions, diagnosis, referral, mental health support, physical health support, transition).
- a. What are your expectations and needs when conducting a primary care consultation, or providing other forms of healthcare support in relation to ADHD?
- b. How do you approach the patient's relationship with their parent/carer?

#### 3. Providing care and support for wider mental and physical health through primary care to people with ADHD

- a. Is there anyone at your local practice/PCN with a special interest in ADHD or mental health that can provide psychological or social support to someone with ADHD? (If so, what are your experiences in relation to this?)
- b. In addition to ADHD related needs, how would you consider/discuss a patient's wider mental health during a consultation, or when providing healthcare support?
- c. In addition to ADHD related needs, how would you consider/discuss a patient's wider physical health during a consultation, or when providing healthcare support?
- d. Are you aware of any physical health risks faced by people with ADHD? If so, do you address these when providing healthcare support for people with ADHD, and in which ways?  
(Prompts: awareness of risks re substance use, smoking, other risk -taking behaviours; any signposting to support or information that they undertake; harm reduction strategies etc.)

#### 4. Adjustments to help people with ADHD access primary care

- a. Is there anything that your service does to make it easier for young people with ADHD to access care and support through primary care? What changes could be made to make it easier for them to access care? (Prompts: physical location, online/face-to-face, appointment reminders)
- b. What can a primary care provider do to make it easier for young people with ADHD to attend appointments and get the help they need when they need it? (Prompts: any proactive management strategies, such as regular reviews, transition support appointments, provision of information)

#### 5. Support for primary care providers working with young people with ADHD

- a. What are the current challenges you face in providing care and support to young people with ADHD?
- b. Is there anything that your service could do to make it easier for you to provide care and support? What changes could be made to help you and your team/service to provide better care? (Prompts: financial incentives, training, staffing, information resources, decision making tools, care pathways, technology, digital resources)
- c. What can a primary care provider do to make it easier for young people with ADHD to attend appointments and get the help they need?

#### 6. Information and resources

- a. What kinds of information, resources or support do you need as a primary care provider to help you or your service?
  - i. Recognise possible ADHD symptoms
  - ii. Make appropriate referrals
  - iii. Prescribe through shared care
  - iv. Support YP through transition
  - v. Provide appropriate advice to patients in relation to self-management
  - vi. Signpost patients to high quality and evidence-based resources to help them
    1. Self-manage and understand living with adult ADHD.
    2. Access appropriate healthcare for ADHD.
    3. Access healthcare for wider physical and mental health needs

(Prompts: consider care pathways, contact details, resources on living with ADHD as an adult, transitioning with ADHD, signposting to local agencies)

## 7. Nationally available sources of healthcare, support, and information for self-management of ADHD

- a. What resources are you aware of? (Prompts: online, organisations, NHS website, social media, YouTube, friends, family) Do you ever signpost YP to them?
- b. If a selection of high-quality resources were available nationally, what would be most useful for your role? (e.g., information resources on NHS website, video stories, clinical decision-making tools, apps)

## 8. Learning from resources for treating other long-term conditions in primary care

- a. Are there any tools or resources available to you for other conditions (e.g., clinical decision apps) that could be adapted to support clinicians providing support to a young person with ADHD? Or for young people themselves to use?
- b. If so, please can you describe?

## 9. Feedback on information resource examples

- a. What is your preferred method for gaining information about treatment and support for adult ADHD? (Researcher to share examples and seek feedback)

## 10. Reflection/Close

- a. If you spoke to someone in primary care providing healthcare for a young adult with ADHD, what advice would you give to them:
  - i. about making sure YP with ADHD get the treatment and support they need?
  - ii. about useful resources for YP?
  - iii. about questions to ask a young person, and the best ways of listening?
- b. If you spoke to a young person with ADHD who needed to access healthcare for their ADHD through their primary care provider, what advice would you give to them:
  - iv. about medication?
  - v. about who to talk to in the practice?
  - vi. what to say to their GP, and which questions to ask?



## Interview Topic Guide – WP2 (Young people and parents/carers)

**Study title:** Managing young people with ADHD in primary care (MAP) study

**Chief Investigator:** Dr Anna Price [a.price@exeter.ac.uk](mailto:a.price@exeter.ac.uk). Telephone 01392 726026

*Please note this topic guide is for researchers only. This will be used to prompt questions during the interview. This is not a questionnaire. This topic guide will be adapted and refined following findings from WP1, and in consultation with MAP study research advisory groups.*

This interview aims to explore your experiences in relation to accessing services and support for ADHD through a primary care provider (e.g., GP practice or local surgery). There will be a particular focus on factors that have made it easier and those that have made it harder to access care. Also, on any recommendations you may have to improve access to primary care for young people with ADHD in the future.

### Demographics

1. **What is your primary role?** (e.g., young person (YP) with ADHD or parent/carer)
2. **What other roles also describe you?** (e.g., also, a health worker, student)
3. **What is your age (or the age of the YP if you are a parent/carer)?**
4. **What is your geographic location?** (e.g., postcode of your workplace, address, or postcode of local GP practice)

### Research topic guides

#### 1. Current healthcare context

- a. What are your experiences of accessing healthcare for ADHD? (Prompts: cover GP, specialist services, CAMHS, AMHS, psychological therapies)
- b. Do you (or does your child) have any co-existing mental health problems? If so, what are your experiences of accessing care for these?
- c. Do you (or does your child) have any co-existing physical health problems? If so, what are your experiences of accessing care for these?

#### 2. Accessing care and support for ADHD through primary care

- a. Please tell us about your experiences of accessing (or trying to access) care for ADHD via your local primary care practice. (Prompts: prescriptions, diagnosis, referral, mental health support, physical health support, transition).
- b. What are your expectations and needs from a consultation, or other support in primary care in relation to your ADHD?
- c. What role does your parent/carer have in helping you to access care and support? (Or what role do you have as a parent/carer, and what role does the young person take)

#### 3. Accessing care and support for wider mental and physical health through primary care when you have ADHD

- a. Is there anyone at your local practice with a special interest in ADHD or mental health that you can talk to if you need psychological support? (If so, what are your experiences in relation to this?)
- b. Have you had a chance to discuss your mental health more widely with your primary care provider?



- c. Have you had a chance to discuss your physical health more widely with your primary care provider?
- d. Are you aware of any health risks faced by people with ADHD? If so, have you had a chance to discuss these with your primary care provider? (Prompts: awareness of risks re substance use, smoking, other risk-taking behaviours; any signposting to support or information that they undertake; harm reduction strategies etc.)

#### 4. Adjustments for accessing primary care support when you have ADHD

- a. What have your experiences been trying to get an appointment with your GP?
- b. Is there anything about your ADHD that makes it harder to access care and support through your GP? What would make it easier for you to access care? (Prompts: physical location, online/face-to-face, appointment reminders)
- c. What can your primary care provider do to make it easier for you to attend an appointment and get the help you need?

#### 5. Information and resources needed to help with management and self-management of ADHD

- a. What kinds of information and resources do you need from your primary care provider? (Prompts: about care pathways, contact details, living with ADHD as an adult, transitioning with ADHD, resources, signposting to local agencies). To help you:
  - i. Recognise possible ADHD symptoms
  - ii. Get a referral to a specialist service
  - iii. Get your prescriptions
  - iv. Have the support you need through transition
- b. And more generally...
  - i. Manage and understand living with adult ADHD.
  - ii. Access the healthcare you need for your ADHD.
  - iii. Understand and access physical and mental healthcare support that is not directly related to your ADHD

(Prompts: videos, visual diagrams, website links, signposting to services, meetings, people, resources on living with ADHD as an adult, transitioning with ADHD)

#### 6. Other sources of healthcare, support, and information for management and self-management of ADHD

- a. What resources have you accessed? (Prompts: online, organisations, NHS website, social media, YouTube, friends, family)
  - i. Can you provide positive and negative examples of your experience of accessing support through these other methods?
  - ii. Is there anything that primary care providers could learn from your experiences with these other resources?

#### 7. Feedback on information resource examples

- a. What is your preferred method for gaining information about treatment and support for adult ADHD? (Researcher to share examples and seek feedback)

#### 8. Reflection/Close

- a. If you spoke to someone in primary care providing healthcare for a young adult with ADHD, what advice would you give to them?

- 1  
2  
3  
4  
5  
6  
7  
8  
9  
10  
11  
12  
13  
14  
15  
16  
17  
18  
19  
20  
21  
22  
23  
24  
25  
26  
27  
28  
29  
30  
31  
32  
33  
34  
35  
36  
37  
38  
39  
40  
41  
42  
43  
44  
45  
46  
47  
48  
49  
50  
51  
52  
53  
54  
55  
56  
57  
58  
59  
60
- i. about making sure YP with ADHD get the treatment and support they need?
  - ii. about useful resources for YP?
  - iii. about questions to ask a young person, and the best ways of listening?
- b. If you spoke to a young person with ADHD who needed to access healthcare for their ADHD through their primary care provider, what advice would you give to them?
- iv. about medication?
  - v. about who to talk to in the practice?
  - vi. about what to say to their GP, and which questions to ask?

For peer review only
